# 1 Analysis of subunit folding contribution of three yeast large 2 ribosomal subunit proteins required for stabilisation and 3 processing of intermediate nuclear rRNA precursors.

4  
5  
6  
7 Gisela Pöll<sup>1</sup>, Michael Pils<sup>2</sup>, Joachim Griesenbeck<sup>1\*</sup>, Herbert Tschochner<sup>1\*</sup>, Philipp  
8 Milkereit<sup>1\*</sup>

9  
10  
11  
12 1 Chair of Biochemistry III, Regensburg Center for Biochemistry, University of  
13 Regensburg, Regensburg, Germany

14  
15 2 Structural Biochemistry Unit, Regensburg Center for Biochemistry, University of  
16 Regensburg, Regensburg, Germany

17  
18 \* Corresponding authors

19 [joachim.griesenbeck@vkl.uni-regensburg.de](mailto:joachim.griesenbeck@vkl.uni-regensburg.de)

20 [herbert.tschochner@vkl.uni-regensburg.de](mailto:herbert.tschochner@vkl.uni-regensburg.de)

21 [philipp.milkereit@vkl.uni-regensburg.de](mailto:philipp.milkereit@vkl.uni-regensburg.de)

## 22 23 24 25 26 **Abstract**

27  
28 In yeast and human cells many of the ribosomal proteins (r-proteins) are required for  
29 the stabilisation and productive processing of rRNA precursors. Functional coupling  
30 of r-protein assembly with the stabilisation and maturation of subunit precursors  
31 potentially promotes the production of ribosomes with defined composition. To further  
32 decipher mechanisms of such an intrinsic quality control pathway we analysed here  
33 the contribution of three yeast large ribosomal subunit r-proteins for intermediate  
34 nuclear subunit folding steps. Structure models obtained from single particle cryo-  
35 electron microscopy analyses provided evidence for specific and hierarchic effects on  
36 the stable positioning and remodelling of large ribosomal subunit domains. Based on  
37 these structural and previous biochemical data we discuss possible mechanisms of r-  
38 protein dependent hierarchic domain arrangement and the resulting impact on the  
39 stability of misassembled subunits.

## 40 41 42 **Introduction**

43 Cellular production of ribosomes involves the synthesis of the ribosomal RNA (rRNA)  
44 and protein (r-protein) components and their accurate assembly and folding. The  
45 rRNAs are initially synthesized as part of precursor transcripts (pre-rRNA) which are  
46 extensively processed and modified. In the yeast *S. cerevisiae* (subsequently called  
47 yeast) as in other eukaryotic model organisms most of these steps take place in the  
48 nucleus, thus requiring subsequent nucleo-cytoplasmic transport of the largely  
49 matured small and large ribosomal subunit (SSU and LSU, respectively) precursors  
50 (reviewed in [1]). In yeast, over 200 factors have been identified which promote the

51 timely coordinated progression of the numerous SSU and LSU maturation events.  
52 Most of these factors interact transiently at defined maturation states either directly or  
53 as component of larger modules with the subunit precursors. This leads to the  
54 formation of a series of intermediary subunit precursor particles whose composition,  
55 rRNA processing states and three-dimensional structures have been deduced in the  
56 past (reviewed in [2–6]).  
57 The structure determination of a wide range of nuclear LSU precursor populations  
58 isolated from yeast wildtype or mutant strains indicated that the orientations of the  
59 seven major LSU rRNA secondary structure domains [7] (subsequently called LSU  
60 rRNA domains) with respect to each other are stabilized in a specific order [8–13]. In  
61 these LSU precursors the folding states within stably oriented domains, including the  
62 associated r-proteins, appear already to a large extent as observed in mature  
63 ribosomes. Structure probing experiments indicated that LSU precursors adopt  
64 prevalently flexible conformations during the very initial stages [14] with some of the  
65 respective RNA-RNA and RNA-protein interactions being progressively established  
66 [15]. Downstream of this, the earliest particles amenable to comprehensive tertiary  
67 structure analyses by single particle cryo-electron microscopy (cryo-EM) showed a  
68 stably folded core of LSU rRNA domains I and II [9]. A defined folding state and  
69 orientation of LSU rRNA domains VI and III towards the early core particle was  
70 observed in early intermediate nuclear pre-LSU populations [9,10,13]. Late  
71 intermediate nuclear particles were characterized by progressive positioning of LSU  
72 rRNA domains IV and V and of the 5S rRNA in context of the previous domains  
73 [11,16]. Downstream of this, at late nuclear maturation stages, the subunit fold is  
74 remodelled by a near 180° rotation of the 5S RNP into its mature orientation [8].  
75 Final maturation, including further stabilisation and refolding of the peptidyl  
76 transferase centre at the LSU subunit interface is thought to continue after nuclear  
77 export in the cytoplasm [12,17–19]. All these steps are accompanied by the timely  
78 coordinated association and removal of factors.  
79 The deduced sequence of the numerous LSU folding, assembly, precursor rRNA  
80 (pre-rRNA) processing and factor recruitment and release events is thought to be  
81 largely caused by hierarchical interrelationships between them. In support of this, the  
82 efficient nuclear export and the progression of many of the pre-rRNA processing  
83 steps depend on the ongoing r-protein assembly in specific ribosomal subregions  
84 [20]. In case of the yeast LSU three groups of r-proteins could be distinguished  
85 whose availability is required for either early (~ phenotype group 1), intermediate  
86 (~phenotype group 2) or late nuclear pre-rRNA processing steps (~phenotype group  
87 3) [21]. Ongoing expression of a fourth group of r-proteins is largely dispensable for  
88 these pre-rRNA maturation steps but still affects, as the others, the stability and  
89 nuclear export of LSU precursors. For each of these r-protein groups the members  
90 bind to up to a few specific subregions of the LSU, often with direct interactions in  
91 between the respective r-proteins (see Figures A and B in S1 Appendix for an  
92 overview). The functional role of r-protein of phenotype groups 1-3 highly correlates  
93 with their step wise appearance within respective rRNA domains as structurally  
94 resolvable regions in nuclear LSU precursor populations. Group 1 proteins are  
95 resolvable together with LSU rRNA domains I and II and the core of domain VI in  
96 early LSU precursor structures. Group 2 proteins are seen at latest together with LSU  
97 rRNA domain III and the rest of LSU rRNA domain VI in density maps of early  
98 intermediate LSU precursors. And group 3 r-proteins can be traced in maps of late  
99 intermediate nuclear LSU precursors together with the 5S RNP and LSU rRNA  
100 domains IV and V. Blocking the expression of individual r-proteins leads to  
101 phenotype group specific cooperative assembly effects and changes in the

102 association of ribosome biogenesis factors with immature LSU particles [22–27]. In  
103 the examined cases, these effects are evident for, but not restricted to direct protein  
104 interaction partners of the *in vivo* depleted r-proteins.

105  
106 Functional coupling of r-protein assembly with the stabilisation and maturation of LSU  
107 precursors potentially serves to promote the production of ribosomes with defined  
108 composition. To further decipher mechanisms of such an intrinsic quality control  
109 pathway we analysed in the present work the impact of selected yeast LSU r-proteins  
110 on the progression of LSU precursor folding. Typically, r-proteins link several rRNA  
111 secondary structure elements in one or more rRNA secondary structure domains by  
112 direct physical contacts. These interactions have the potential to favour the  
113 establishment and stabilisation of the mature tertiary fold in individual RNA secondary  
114 structure domains [28] and to orient secondary structure domains towards each  
115 other. Such impact on the global ribosomal fold might be further enhanced by an  
116 extensive interaction network between r-proteins which is especially evident in the  
117 eukaryotic LSU, and interconnects there all the LSU domains (see Figure A in S1  
118 Appendix for an overview) [29]. In the yeast LSU, single domain binders with little  
119 protein – protein interactions are enriched among the non-essential r-proteins (see  
120 Figure A in S1 Appendix). Consistently, only minor effects on the general rRNA fold  
121 were observed by RNA structure probing in yeast LSU's devoid of the low  
122 connectivity non-essential single domain binder rpL26 (uL24 according to the r-  
123 protein nomenclature published in [30]) [31,32]. By contrast, previous cryo-EM  
124 studies revealed significant impact on the SSU and LSU fold by truncations of the  
125 essential r-proteins rpS20 (uS10) and rpL4 (uL4), respectively [33,34].  
126 Three yeast r-proteins rpL2 (uL2), rpL25 (uL23) and rpL34 (eL34) which are required  
127 for the stabilisation and processing of intermediary nuclear LSU precursors were  
128 included in the present study [21,24,25]. RpL34 primarily binds to LSU rRNA  
129 secondary structure domain III and is additionally embedded by protein-protein  
130 interactions into an r-protein cluster at domain III (see Figures A and B in S1  
131 Appendix). RpL25 connects as two-domain binder LSU rRNA domains I and III by  
132 direct protein-rRNA and by protein-protein contacts (see Figures A and B in S1  
133 Appendix). Both rpL25 and rpL34 are required for intermediate nuclear pre-rRNA  
134 processing steps (~ phenotype group 2), namely the initial cleavage in the internal  
135 spacer 2 (ITS2) RNA separating 5.8S and 25S rRNA [21,35]. In addition, they were  
136 shown to affect the pre-LSU association of rpL2 and rpL43 (eL43) and some factors  
137 starting to be seen in structures of late intermediate LSU precursor populations  
138 [24,25]. The third selected protein, rpL2 establishes together with rpL43 a protein  
139 cluster at the subunit interface with extensive direct contacts to multiple domains (see  
140 Figures A and B in S1 Appendix). These are primarily the LSU rRNA domain IV, and  
141 in addition domains II, III and V. In structural studies rpL2 and rpL43 could only be  
142 visualised starting from late intermediate nuclear stages together with rRNA domain  
143 IV. Coincidentally, biochemical analyses indicated that their association with LSU  
144 precursors is specifically stabilized at intermediate LSU maturation stages  
145 concomitant with the initial cleavage in the ITS2 spacer [25]. Both, rpL2 and rpL43  
146 are required for efficient trimming of the ITS2 (~ phenotype group 3, late nuclear LSU  
147 rRNA processing) downstream of the initial ITS2 cleavage [21].  
148 We wondered if the three r-proteins rpL2, rpL25 and rpL34 with their different  
149 degrees of connectivity in LSUs have a global, a local, or any impact on the yeast  
150 pre-LSU folding pathway. And, if these effects might help to further explain their  
151 previously observed roles for LSU maturation and stability. To this end, LSU  
152 precursor particles were purified from yeast strains in which expression of one of the

153 three r-proteins was shut down. In each case the structures of several particle  
154 populations could be resolved by single particle cryo-EM. Based on derived structure  
155 models we discuss the possible causes and the functional significance of the  
156 observed effects on the yeast LSU pre-rRNA folding pathway.

157

## 158 **Results**

159 To analyse changes in the folding states of intermediate nuclear LSU precursors  
160 upon lack of the r-proteins rpL2, rpL25 or rpL34, yeast strains were used which  
161 conditionally express one of these r-proteins under control of the GAL1/10 promoter  
162 [24,25]. In addition, in these three strains and in a respective control strain the LSU  
163 biogenesis factor Nog1 is chromosomally encoded in fusion with a tandem affinity  
164 purification (TAP) tag (see Materials and Methods) [36].

165 As expected, shutting down the GAL1/10 promoter in glucose containing medium  
166 prevented growth of the three conditional r-protein expression mutants, while all four  
167 strains could be cultivated in galactose containing medium (S2 Appendix) [21,37].  
168 Consistent with previous studies, some growth delay was observed in galactose  
169 containing medium in the strains expressing the Nog1-TAP fusion protein (S2  
170 Appendix, compare growth of the untagged with the tagged strains in YPG) [34,38].  
171 LSU particles associated with TAP tagged Nog1 were affinity purified after four hours  
172 shift to glucose containing medium. As expected, northern blotting experiments  
173 indicated that these contained in the control strain LSU pre-rRNA before (27SA+B  
174 pre-rRNA), and after the ITS2 was cleaved (25.5S + 7S pre-rRNA) and removed  
175 (25S and 5.8S rRNA) (lanes 2 in Fig 1A-C) [25,36]. A similar LSU pre-rRNA  
176 processing state was detected in particles purified after *in vivo* depletion of rpL21  
177 (lanes 6 in Fig 1A-C). The latter is required for nuclear export but has no obvious role  
178 in LSU rRNA processing (~ phenotype group 4) [21,25]. Furthermore, the RNA  
179 analyses corroborated previous results [21,24,25] indicating that two consecutive  
180 intermediate nuclear LSU pre-rRNA processing steps are inhibited after expression  
181 shut down of either rpL25 and rpL34, or of rpL2: initial cleavage in the ITS2 (~  
182 phenotype group 2), and trimming of the ITS2 towards the 5.8S rRNA 3' end (~  
183 phenotype group 3). For rpL25 and rpL34 the ratio of 27S rRNA to its cleavage  
184 products (7S and 25.5+25S) was increased in the purified particles (lanes 3-4 in Fig  
185 1A-C, compare with control strain lanes 2) and for rpL2 the ratio of 7S rRNA to the  
186 trimmed 5.8S rRNA (lanes 1 and 5 in Fig 1A-C, compare with control strain lanes 2).

187

### 188 **Key folding events of intermediate nuclear LSU precursors can be detected in 189 **Nog1-TAP associated particle populations****

190 Single particle cryo-EM analysis followed by particle sorting and three-dimensional  
191 structure reconstruction revealed six major populations of LSU precursors in the  
192 control sample. These are named in the following Nog1TAP-A, -B, -C, D, -E and  
193 Nog1TAP-F (see Material and Methods and S3 Appendix for data acquisition  
194 strategies, see S5 Appendix for particle sorting and processing strategies). The  
195 obtained maps reached sub-nanometre resolution-range (see S3 Appendix for  
196 resolution estimates) allowing for model generation by flexible fitting of previously  
197 published nuclear LSU precursor models (see Materials and Methods).

198 Five of the observed major folding states largely resembled the ones of several  
199 previously described nuclear LSU precursor populations. Thus, key events in the  
200 intermediate nuclear pre-LSU folding pathway could be recapitulated in structure  
201 models derived from the obtained electron density maps: In state Nog1TAP-F (see  
202 Fig 2A and Fig 3A, see also Figure G in S1 Appendix visually summarizing detected  
203 rRNA helices and proteins with their predicted interactions) LSU rRNA domains I, II



204 and VI were observed in a folding state which resembled in large parts the one  
205 found in mature ribosomes. Additional densities could be attributed to the proximal  
206 parts of the ITS2 spacer, and to more than 15 ribosome biogenesis factors and  
207 around 20 r-proteins most of which being required for early and intermediate nuclear  
208 LSU pre-rRNA processing steps. State Nog1TAP-D (S5 Appendix), for which no  
209 molecular model was created resembled state Nog1TAP-F. Still, unlike Nog1TAP-F it  
210 lacked clear densities for the ITS2 spacer RNA and associated factors.  
211 In state Nog1TAP-E (see Fig 2B, Fig 3B and Figure F in S1 Appendix) a group of four  
212 factors (Rpf1, Nsa1, Rrp1, Mak16) was possibly released from the subunit. In  
213 contrast to state Nog1TAP-F, these could not anymore be detected bound to the  
214 rRNA expansion segment ES7 and LSU rRNA domains I and II at the subunit solvent  
215 surface. Otherwise, a hallmark of state Nog1TAP-E was the appearance of density  
216 unambiguously attributable to LSU rRNA domain III and many of the r-proteins  
217 associated with it. Among them were rpL25 and rpL34, and other LSU rRNA domain  
218 III binders required for the initial cleavage in the ITS2 spacer of LSU pre-rRNA. The  
219 two-domain binder rpL25 contributes at this stage to the newly formed interaction  
220 interface linking LSU rRNA domains I and III.  
221 Starting with state Nog1TAP-C (see Fig 2C, Fig 3C and Figure E in S1 Appendix)  
222 densities for large parts of LSU rRNA domains IV and V and the 5S rRNA were  
223 detected. Consistent with previous studies the latter was not positioned in this state  
224 as in mature ribosomes. It was rather rotated by about 180° around its vertical axis.  
225 Several factors (Ytm1, Erb1, Noc3, Ebp2, Brx1, Spb1, Nop16) previously associated  
226 with LSU rRNA domains I, II and III were not anymore observed and thus possibly  
227 released or with flexible orientation. Various other factors (Rrs1, Rpf2, Rsa4, Nog2,  
228 Nop53, Cgr1) and r-proteins (rpL2, rpL43, rpL5, rpL11, rpL21) newly appeared in  
229 Nog1TAP-C in association with the emerging rRNA domains. The multi-domain  
230 binder rpL2, together with its binding partner rpL43 is now one of the proteins  
231 connecting the previously visible LSU rRNA domains II and III with the newly  
232 appearing rRNA of domains IV and V at the subunit interface. Altogether states  
233 Nog1TAP-F, Nog1TAP-E and Nog1TAP-C recapitulate previously identified  
234 hallmarks of the transition from early intermediate to late intermediate LSU  
235 precursors [9].  
236 Starting with state Nog1TAP-B (see Fig 2D, Fig 3D and Figure D in S1 Appendix) no  
237 density could be detected anymore for the ITS2 spacer nor for a group of factors  
238 associated with it and with LSU rRNA domains I and III (Rlp7, Nop15, Cic1, Nop7,  
239 Nop53). Here, trimming of the ITS2 spacer might have led to the release of these  
240 factors [39].  
241 Finally, for state Nog1TAP-A (see Fig 2E, Fig 3E and Figure C in S1 Appendix) the  
242 density map data support that rotation of the 5S RNP towards its mature position has  
243 partially occurred. Densities attributable to 5S rRNA helices 5 and 6 in the mature  
244 position were detected and clear densities for factors binding (via rpL5) to the 5S  
245 RNP in its premature position were lost (Rsa4, Rrs1, Rpf2).  
246 Apparently, other late nuclear and early cytoplasmic LSU populations with the 5S  
247 RNP rotated into its mature position were underrepresented, when considering that  
248 untagged Nog1 was previously detected in such particles which associated with  
249 carboxy terminal truncated TAP tagged Rlp24 [12]. Carboxy terminal TAP tagging of  
250 Nog1 likely interferes with the previously described insertion of Nog1's carboxy  
251 terminal domain into the LSU peptide exit tunnel [11,12]. Indeed, corresponding  
252 densities could not be detected in Nog1-TAP associated LSU populations. The  
253 observed effects on growth rate by TAP tagging of Nog1 (see above, S2 Appendix)  
254 and previous LSU folding analyses of particles from Nog1 mutant strains [34] thus

255 suggest that progression of downstream nuclear LSU maturation steps was delayed  
256 in this situation to some extent.

257

### 258 **Evidence for global perturbation of the intermediate nuclear folding pathway of** 259 **LSU particles lacking domain III binders rpL34 or rpL25**

260 This overall representation of intermediate nuclear LSU precursor folding states was  
261 not seen for Nog1-TAP associated particles purified from rpL34 expression mutants.  
262 Here, only two major folding states (Nog1TAP\_L34-A, Nog1TAP\_L34-B) were  
263 observed in single particle cryo-EM analyses (see Fig 4 and Figures M and N in S1  
264 Appendix). For both, the pre-rRNA folding status resembled the one of state  
265 Nog1TAP-F which was observed only for a minor subpopulation of ribosomal  
266 particles in the control sample (see processing schemes in S5 Appendix). Defined  
267 densities of rRNA domains III, IV and V and the 5S RNA were virtually absent as well  
268 as associated factors and r-proteins, including rpL34 itself. In contrast to state  
269 Nog1TAP\_L34A, in state Nog1TAP\_L34B many of the factors were lacking which  
270 were bound in Nog1TAP-F to the ITS2 RNA and to the LSU rRNA domains I, II and  
271 the ES7 element (compare Figures G, M and N and in S1 Appendix). Similarly, here  
272 the densities attributable to parts of the ITS2 spacer RNA could not be detected.  
273 Expression shut down of LSU rRNA domain I and III binder rpL25 led to similar  
274 effects on the pre-LSU folding pathway. Again, two major folding states,  
275 Nog1TAP\_L25-A and Nog1TAP\_L25-B, were detected in Nog1-TAP samples purified  
276 from cells where expression of rpL25 was shut down (see Fig 5 and Figures K and L  
277 in S1 Appendix). Both were, again, characterized by the absence of clear densities  
278 for LSU rRNA domains III, IV and V and the 5S rRNA and their associated proteins  
279 including rpL25. Hence, their overall fold again closely resembled the one of the low-  
280 populated Nog1TAP-F state of the control sample. Only minor displacements of  
281 rpL25 main contact sites in LSU rRNA domain I (helices 9 and 10) were observed  
282 when compared with states of the control sample showing clear rpL25 densities. The  
283 factor and r-protein composition of state Nog1TAP\_L25-B largely resembled the one  
284 observed in state Nog1TAP-F. On the other hand, in state Nog1TAP\_L25-A several  
285 factors binding to LSU rRNA domains I and II and the ES7 element could not be  
286 detected (Ebp2, Brx1, Rpf1, Nsa1, Rrp1, Mak16).

287 In summary these structural studies indicated that both rpL25 and rpL34 have a  
288 crucial role for the stable positioning of LSU rRNA domain III in nuclear LSU  
289 precursors. Moreover, they provided evidence that initial positioning and remodelling  
290 of LSU rRNA domains IV and V and the 5S RNP depend on the upstream assembly  
291 of rpL25 and rpL34.

292

### 293 **Evidence for a major role of the multi-domain binder rpL2 on nuclear LSU** 294 **subunit interface formation**

295 Further single molecule cryo-EM analyses revealed a different folding phenotype for  
296 Nog1-TAP associated LSU particles from cells in which expression of rpL2 was shut  
297 down. RpL2 is required for the trimming of the ITS2 spacer towards the 5.8S rRNA 3'  
298 end. Hence, here LSU pre-rRNA processing is impaired just downstream of the rpL25  
299 and rpL34 dependent initial cleavage inside the ITS2 spacer. As mentioned above,  
300 rpL2 is a multi-domain binder connecting at the subunit interface in a complex with  
301 rpL43 the LSU rRNA domains II, III, IV and V.

302 Three particle populations with dominant folding states, designated here as  
303 Nog1TAP\_L2-A, Nog1TAP\_L2-B and Nog1TAP\_L2-C could be distinguished after *in*  
304 *vivo* depletion of rpL2. The rRNA fold of Nog1TAP\_L2-B resembled again the one of  
305 early intermediate LSU precursors of state Nog1TAP-F analyses (see Fig 6C and Fig

306 6D and Figure I in S1 Appendix). Most of the LSU rRNA domains I, II and VI were  
307 correctly folded while clear densities attributable to LSU rRNA domains III, IV and V  
308 and the 5S rRNA were missing. The ITS2 spacer RNA together with several factors  
309 bound to it or to LSU rRNA domains I, II and the ES7 element could not be visualized  
310 in Nog1TAP\_L2-B.

311 State Nog1TAP\_L2-C (see Fig 6E and Fig 6F and Figure J in S1 Appendix) clearly  
312 differed in one point from all the previous folding states of misassembled particles:  
313 here, densities could be clearly attributed to the LSU rRNA domain III and several  
314 associated factors and r-proteins. Nog1TAP\_L2-C thus resembled state Nog1TAP-E  
315 of the control sample (see Fig 2B, Fig 3B and Figure F in S1 Appendix).

316 Finally, the third population of particles depleted of rpL2 were found in an  
317 unprecedented folding state Nog1TAP\_L2-A. Here, most of the densities of LSU  
318 rRNA domains I, III and IV and the ITS2 spacer were missing. On the other hand,  
319 LSU rRNA domain VI was clearly detected and the 5S RNP was docked in the  
320 premature rotated position on LSU rRNA domains II and V. These were decorated in  
321 a similar way with factors and r-proteins as observed in state Nog1TAP-C from the  
322 control sample.

323 As rpL2 itself and rpL43, most of its major RNA contact sites, including helix H66 in  
324 LSU rRNA domain IV and expansion segment ES31 in LSU rRNA domain V were not  
325 traceable in any of these states. Still, three of the L2 contact sites were partially  
326 visible in Nog1TAP\_L2-C. Among them, helix H34 in LSU rRNA domain II and a site  
327 between helices H55 and H56 in LSU rRNA domain III were only slightly shifted.  
328 Helix H75 in LSU rRNA domain V was found still far from its mature position in which  
329 it contacts rpL2 after remodelling of the LSU subunit interface.

330 In sum, the data indicated that initial positioning of LSU rRNA domain III and the 5S  
331 RNP can occur independently of rpL2 assembly. By contrast, 5S RNP remodelling  
332 and the arrangement of LSU rRNA domain IV and the 5' region of domain V 5' at the  
333 subunit interface around the rpL2-rpL43 complex were not detectable.

334

## 335 Discussion

336

337 The structural analyses performed here provide evidence for strong and specific  
338 effects on the yeast LSU precursor folding pathway upon blockage of the assembly of  
339 three different LSU r-proteins. The respective pre-rRNA processing phenotypes  
340 correlated for the utilized yeast mutant strains with the observed LSU folding  
341 phenotypes. For the rpL2 mutant strain belonging to pre-rRNA processing phenotype  
342 group 3, folding deficiencies in LSU rRNA domains IV and V at the subunit interface  
343 and a premature 5S RNP orientation were observed. For the rpL25 and rpL34 mutant  
344 strains belonging to pre-rRNA processing phenotype group 2 the LSU folding  
345 pathway was compromised upstream of this. Here, the 5S RNP could not be  
346 visualized and LSU rRNA domain III was not yet stably positioned in addition to LSU  
347 rRNA domains IV and V. Both rpL25 and rpL34 establish significant interactions with  
348 LSU rRNA domain III (see Figures A and B in S1 Appendix for an overview). Hence,  
349 insufficient LSU rRNA domain III assembly is likely a primary cause for the structural  
350 effects observed on this region. Indeed, previous in-depth mutant analyses  
351 highlighted the importance of the yeast rpL25 interaction with LSU rRNA domain III  
352 for ITS2 cleavage (~ phenotype group 2) and LSU maturation [35,40,41]. They  
353 furthermore indicated that changes in the LSU rRNA domain III primary structure can  
354 lead to severe delay in ITS2 cleavage independent of their effect on rpL25 binding  
355 [42,43].

356 Compared to rpL34, which is deeply embedded into the LSU rRNA domain III  
357 architecture, rpL25 has more extensive contact interfaces to outside components.  
358 Several of them, as helix H10 in LSU rRNA domain I, the LSU rRNA domain I binder  
359 rpL35 (group 2 phenotype) and the ITS2 binding factor Nop15 can be detected  
360 already before the LSU rRNA domain III in LSU precursor density maps (see Figure  
361 G in S1 Appendix). It is thus plausible that in case of rpL25 the failure to stably  
362 position LSU rRNA domain III might additionally relate to these bridging interactions.  
363

364 Stable folding and association of LSU rRNA domain III with the preformed domain I-  
365 II-VI core particle might affect the downstream arrangement of the other domains IV  
366 and V at the subunit interface, and of the 5S RNP in a hierarchical fashion. In line  
367 with this, previous biochemical studies revealed that the stable incorporation  
368 of several r-proteins and factors depend on LSU rRNA domain III assembly events  
369 [24,25]. Among them are the direct rpL25 interactor Nop53 and the r-proteins rpL2  
370 and rpL43 which bind to LSU rRNA domain III (see Figure A in S1 Appendix).  
371 Importantly, rpL2 and rpL43 also contact extensively LSU rRNA domain IV and might  
372 therefore contribute to its spatial arrangement in relation to domain III. Indeed, the  
373 present analyses of folding states of LSU precursors depleted of rpL2 provided direct  
374 evidence for its importance for the positioning of the domain IV and for the related  
375 LSU subunit interface remodelling. Hence, effects of LSU rRNA domain III assembly  
376 on these aspects of the LSU rRNA folding pathway can be directly attributed to its  
377 role for stable recruitment of rpL2 and rpL43.

378 Initial arrangement of the 5S RNP in its premature position was still detected after *in*  
379 *vivo* depletion of rpL2, although only in a smaller subpopulation of ribosomal particles  
380 (~21k particles in Nog1TAP\_L2-A of ~98k total ribosomal particles, see Figure B in  
381 S5 Appendix) when compared to the control sample (~147k particles in Nog1TAP-A,  
382 Nog1TAP-B and Nog1TAP-C of total ~267k ribosomal particles, see Figure A in S5  
383 Appendix). This indicates that besides stable assembly of rpL2 and its effects on the  
384 positioning of LSU rRNA domains IV and V, additional pathways contribute to enable  
385 initial 5S RNP positioning downstream of LSU rRNA domain III assembly.

386 We assume that many more of the r-proteins which are required for efficient LSU  
387 rRNA processing, stabilisation and nuclear export are playing important roles for the  
388 progression of LSU rRNA domain integration and for their remodelling. In support of  
389 this in a previous study the truncation of yeast rpL4 led to perturbations in the LSU  
390 folding pathway [34]. In the present work, the strong impact for rpL2, rpL25 and  
391 rpL34 assembly on hierarchical folding of several full LSU (sub-)domains provide new  
392 insights into their role in subunit stabilisation. On one hand, the 5' end of the 5.8S  
393 rRNA is already protected in the mis-assembled particles from exonucleolytic  
394 trimming by multiple parallel acting means [26,44,45]: 1) the 5.8S rRNA 5' end  
395 is embedded in a double strand through formation of helix 2, 2) it is bound by  
396 rpL17, and 3) its steric access is safely blocked through positioning of LSU rRNA  
397 domain VI on top of it. That is consistent with the defined processing state of the 5.8S  
398 rRNA 5' end which was previously observed for all the three r-protein assembly  
399 mutants [21]. On the other hand, the non-positioned flexible (sub-)domains in the  
400 mis-assembled particles should substantially increase at a multitude of other sites  
401 the accessibility for general nuclear RNA degradation machineries. That effect is  
402 likely still increased in the subpopulations of misassembled particles for which  
403 numerous factors were not anymore detectable (Nog1TAP\_L2-B, Nog1TAP\_L25-A,  
404 Nog1TAP-L34B, see S1\_Appendix, compare also with mutant LSU precursor  
405 populations depleted of factors in [46]). These populations might represent newly



406 made subunits with limited access to these factors, possibly through a delay of their  
407 release from accumulating misassembled particles.

408 Overall, we consider that the decision to further mature or to degrade a nuclear LSU  
409 precursor is primarily under kinetic control, with compact and defined folding states  
410 protecting from degradation [47]. Consequently, insufficient r-protein assembly might  
411 speed up degradation through the observed blockage at key points of the LSU  
412 folding pathway. Strong hierarchical effects on the particle folding states by the  
413 assembling components in an environment of overall high RNA decay activity may  
414 thus define an intrinsic compositional control mechanism during yeast LSU  
415 maturation.

416

## 417 **Materials and Methods**

418

### 419 **Affinity purification of TAP tagged Nog1 associated particles for cryo-EM** 420 **analyses**

421 TAP-tagged [48] Nog1 and associated particles were purified from total cellular  
422 extracts in one step using rabbit IgG coupled to magnetic beads as described in  
423 [49,50] with minor modifications. Yeast strain Y1877 and conditional r-protein  
424 expression mutant strains Y1813, Y1816, Y1921 and Y2907 (described in [24,25])  
425 were cultivated at 30°C in YPG (1% yeast extract, 2% bacto peptone, 2% galactose)  
426 followed by incubation in YPD (1% yeast extract, 2% bacto peptone, 2% glucose) for  
427 4 hours at 30°C. Cells from 2 litres of culture (optical densities at 600nm between 0.8  
428 and 1.5) were harvested by centrifugation for 5 minutes at room temperature at  
429 5000g. The cells were washed once in ice cold water and then stored at -20°C. Cells  
430 were thawed on ice, washed once in 40 millilitres of buffer A200 (200 mM potassium  
431 chloride, 20mM Tris pH8, 5mM magnesium acetate) and were then suspended per  
432 gram of wet cell pellet in 1.5 millilitres of buffer A200 with 0.04U/millilitre RNasin  
433 (Promega), 1 mM phenylmethylsulfonyl fluoride and 2 mM benzamidine. The cellular  
434 suspension was distributed in portions of 0.8 millilitres to reaction tubes with 2  
435 millilitre volume to which 1.4 grams of glass beads (0.75 - 1 millimetre, Sigma) were  
436 added. Cells were disrupted by shaking them six times for six minutes at full speed  
437 on a Vibrax shaking platform (IKA) placed in a room with 4°C ambient temperature.  
438 The samples were cooled on ice in between shaking cycles. The crude extract was  
439 cleared by two consecutive centrifugation steps for 5 and 10 minutes at 15000g at  
440 4°C. The protein concentration of the resulting supernatant was determined by the  
441 Bradford protein assay (Bio-Rad). Extract volumes containing 200 micrograms of  
442 protein was added to 500 microlitres cold buffer AE (50mM sodium acetate pH 5.3  
443 and 10mM ethylenediaminetetraacetic acid) and stored at -20°C for subsequent RNA  
444 extraction and northern blotting analysis. The cleared extract was adjusted to 0.5%  
445 Triton X100 and 0.1% Tween 20 and added to magnetic beads prepared from 400  
446 microlitres of an IgG (rabbit serum, I5006-100MG, Sigma)-coupled magnetic beads  
447 slurry (1 mm BcMag, FC-102, Bioclone) equilibrated in buffer A200. After incubation  
448 for one hour at 4°C the beads were washed five times with 1 millilitre cold buffer  
449 A200 with 0.5% Triton X-100 and 0.1% Tween 20 and two times with buffer A200.  
450 Five percent of the suspension was added to 500 microlitres of ice-cold buffer AE  
451 and stored at -20°C for subsequent RNA analyses by northern blotting. The residual  
452 magnetic beads were then incubated for two hours at 4°C and for one hour at 16°C in  
453 83 microlitres of buffer A200 with 20 Units RNasin (Promega), 12mM DTT and 16  
454 micrograms of TEV-Protease. The eluate was taken off from the beads and 5% were  
455 added to 500 microlitres of ice-cold buffer AE and stored at -20°C for subsequent  
456 RNA analyses by northern blotting. 3 microlitres of undiluted eluate and of eluate

457 which was diluted 1:2 or 1:4 in buffer A200 were blotted onto holey carbon R 1.2/1.3  
458 copper 300 mesh grids (Quantifoil) and vitrified in liquid ethane using a Vitrobot  
459 MarkIV device (ThermoFisher). Blotting and waiting times were 5 seconds and the  
460 grids were hydrophilized and cleaned just before sample application using a Pelco-  
461 Easiglow system (two times 100 seconds, 0.4mbar, 15mA, air atmosphere). Grids  
462 were stored in liquid nitrogen and pre-screened for appropriate particle concentration  
463 and ice quality on a JEM-2100F (JEOL) electron microscope equipped with a single-  
464 tilt 626 liquid nitrogen cryo-transfer holder (Gatan) and a TEMCAM-F416 camera  
465 (TVIPS). Final data acquisition was performed on a Titan-Krios G3 electron  
466 microscope equipped with an X-FEG source and a Falcon III direct electron detector  
467 camera (ThermoFisher) (see S3 Appendix for acquisition parameters). The linear  
468 mode of the Falcon III detector was used for data acquisition [51].

469

### 470 **RNA extraction and northern blotting**

471 RNA extraction from samples taken during affinity purification was performed as  
472 described in [52] with minor modifications. Samples in buffer AE (see above) were  
473 thawed on ice and 500 microlitres of phenol (equilibrated in buffer AE) and 50  
474 microlitres of 10% (w/v) SDS were added. After 6 minutes of vigorous shaking at  
475 65°C the samples were cooled down on ice for two minutes and then centrifuged at  
476 13000g and 4°C for two minutes. The upper layer was transferred to a new reaction  
477 tube containing 500 microlitres of phenol (equilibrated in buffer AE) and after  
478 vigorous mixing for 10 seconds the mixture was again centrifuged at 13000g and 4°C  
479 for two minutes. This procedure was repeated once with 500 microlitres of  
480 chloroform. The upper layer was again carefully taken off and RNA contained was  
481 precipitated by adding 2.5 volumes of ethanol and 1/10 volume of 3M sodium acetate  
482 pH5.3. In case of affinity purified fractions, 10 micrograms of glycogen (Invitrogen)  
483 were added. Each sample was then briefly mixed and incubated for more than 10  
484 minutes at -20°C before centrifugation for 30 minutes at 4°C and 13000g. The  
485 supernatant was carefully discarded, and the pellet was dissolved in 20 microlitres of  
486 ice-cold water. RNA separation on formaldehyde/MOPS agarose gels (1.3%) or  
487 urea/TBE/polyacrylamide gels (8%) and northern blotting to positively charged nylon  
488 membranes (MP Biomedicals) were done essentially as described in [53].  
489 Hybridization with radioactively (<sup>32</sup>P) end labelled oligonucleotide probes indicated in  
490 the figure legends was done overnight in a buffer containing 50% formamide, 1  
491 milligram/millilitre Ficoll, 1 milligram/millilitre polyvinylpyrrolidone and 1  
492 milligram/millilitre bovine serum albumin, 0.5% (w/v) SDS and five times concentrated  
493 SSC (twenty times concentrated SSC: 3 M sodium chloride, 300 mM sodium  
494 citrate) at 30°C. The sequence of the oligonucleotide probes used were 5'-  
495 CTCCGCTTATTGATATGC-3' for O212, 5'-GGCCAGCAATTTCAAGTTA-3' for O210  
496 and 5'-TTTCGCTGCGTTCTTCATC-3' for O209. After hybridization with the probes  
497 the membranes were shortly washed once at ambient temperature with two times  
498 concentrated SSC and then once for 15 minutes with two times concentrated SSC  
499 and once for 15 minutes with SSC at 30°C. Labelled (pre-)rRNA signals were  
500 detected on the washed membranes using a Typhoon Imager FLA9500 (GE  
501 Healthcare). For re-probing, membranes were incubated twice with 100 millilitres of a  
502 boiling 0.1% (w/v) SDS solution in water. Each time the solution was let cool down to  
503 ambient temperature and then discarded.

504

### 505 **Cryo-EM data processing and structure model fitting, interpretation and** 506 **visualization**

507 Cryo-EM data processing was performed in Relion 3.0 [54]. Beam induced motion  
508 correction was done using Relions own implementation of the MotionCor2 algorithm  
509 [55]. Contrast transfer functions of images were estimated using CTFFIND4.1 [56].  
510 Candidate particles were picked using Relions template based auto-picking  
511 algorithm. More details on single particle processing and classification strategies for  
512 the different experimental datasets are shown in S5 Appendix. Relions 3D auto-refine  
513 algorithm was used with the solvent-flattened FSC option for final refinements with  
514 the respective subsets of particle images. For model generation, the maps were  
515 further modified using the density-modification procedure in the phenix software  
516 package [57,58].

517 Starting model 3jct was published in [11], starting model 6n8j in [12], and starting  
518 models 6elz and 6em1 in [9]. The model of *S. cerevisiae* Has1 was taken from pdb  
519 6c0f [10]. Initial rigid body fitting and model editing was done in UCSF Chimera [59]  
520 and in UCSF ChimeraX [60]. The fit of the models to the respective experimental  
521 maps was further improved by molecular dynamics flexible fitting using the Isolde  
522 plugin in UCSF ChimeraX [61]. Molecular dynamics flexible fitting was first done for  
523 individual rRNA domains and their surrounding with distance restraints applied  
524 between nucleobases (typically distance cutoff 5 and kappa 100) which were then  
525 gradually relaxed. Final flexible fitting included the complete model. Global model  
526 geometry parameters (including nucleic acids geometry and rotamer and  
527 ramachandran outliers) were regularized using the geometry minimization tool in the  
528 phenix software packet. Map and model statistics shown in S3 Appendix were  
529 obtained from Relion (resolution) and from the comprehensive cryo-EM validation  
530 tool in the phenix software package [58]. Model statistics shown in S6 Appendix and  
531 S7 Appendix were obtained in UCSF ChimeraX using Python scripts. Here, possible  
532 direct residue interactions were predicted using the ChimeraX command “contacts”  
533 with default settings for overlapCutoff and hbondAllowance parameters. Python  
534 scripts in UCSF ChimeraX were also used to generate the model representations in  
535 Figs 2 - 6, the diagrams indicating coverage in models of individual rRNA helices in  
536 S1 Appendix and for data export to the Cytoscape software packet [62]. The latter  
537 was used for the schematic visualisation of protein components and their predicted  
538 major interaction interfaces shown in S1 Appendix. Yeast LSU rRNA domain and  
539 helices definitions were taken from [7]. All scripts are available upon request. The  
540 model of the mature large ribosomal subunit represented in Figs 2 and 3 and in S1  
541 Appendix was taken from pdb entry 4u3u [63].

542

## 543 **Figure Captions**

544

545 **Fig 1. (Pre-)rRNA composition of Nog1-TAP associated particles purified from**  
546 **yeast conditional r-protein expression mutants.**

547 Cells of yeast strains in which expression of rpL2 (Y1921), rpL21 (Y1813), rpL25  
548 (Y1816), rpL34 (Y2907) or no r-protein (Y1877, label: “---”) was shut down for four  
549 hours were used as starting material for affinity purification of TAP tagged Nog1.  
550 (Pre-)rRNA composition of final eluates was analysed by northern blotting with  
551 probes O210 (A), O212 (B) and O209 (C) which detect the (pre-)rRNAs indicated on  
552 the left. RNA in (A) and (B) was separated by electrophoresis using an agarose gel  
553 and in (C) an acrylamide gel.

554

555 **Fig 2. Structure models of Nog1-TAP associated particle populations from**  
556 **yeast cells with endogenous r-protein expression levels (Y1877).**

557 rRNA of the respective structure models is shown in white cartoon backbone  
558 representation and is further highlighted by a transparent model-volume  
559 representation (8Å resolution), proteins are shown in cartoon backbone  
560 representation with colouring according to functional categories: proteins required for  
561 early pre-rRNA processing are shown in black, for intermediate nuclear pre-rRNA  
562 processing steps in blue, for late nuclear pre-rRNA processing steps in green and for  
563 downstream nuclear maturation and export in red. Non-essential proteins and  
564 proteins with unclear function are shown in grey (see also S6 Appendix). The LSU  
565 subunit interface side is shown on the left and the subunit solvent surface side on the  
566 right for Nog1TAP-F in (A), for Nog1TAP-E in (B), for Nog1TAP-C in (C), for  
567 Nog1TAP-B in (D) and for Nog1TAP-A in (E). Mature large ribosomal subunits are  
568 represented in (F). Positions of RNA helices ES7b, ES41 and the ITS2 are indicated  
569 in (A) for orientation purposes. Detailed protein compositions and model-based  
570 protein-protein and protein-RNA interaction-networks are schematically represented  
571 in figures A - G in S1 Appendix.

572

573 **Fig 3. Folding states of rRNA domains in Nog1-TAP associated particle**  
574 **populations from yeast cells with endogenous r-protein expression levels**  
575 **(Y1877).**

576 rRNA of the respective cryo-EM derived structure models is shown in cartoon  
577 backbone representation together with a transparent model-volume representation  
578 (8Å resolution). LSU rRNA domain I with expansion segment ES7 is coloured in light  
579 blue, domain II in light green, domain III in yellow, domain IV in violet, domain V in  
580 red, domain VI in dark green, the 5S rRNA in black and domain 0 in white.  
581 The LSU subunit interface side is shown on the left and the subunit solvent surface  
582 side on the right for Nog1TAP-F in (A), for Nog1TAP-E in (B), for Nog1TAP-C in (C),  
583 for Nog1TAP-B in (D) and for Nog1TAP-A in (E). Mature large ribosomal subunits are  
584 represented in (F). Positions of RNA helices ES7b, ES41 and the ITS2 are indicated  
585 in (A) for orientation purposes. Presence of individual LSU rRNA helices in the  
586 respective structure models is schematically represented in bar diagrams in figures A  
587 - G in S1 Appendix.

588

589 **Fig 4. rRNA folding states and structure models of Nog1-TAP associated**  
590 **particle populations from yeast cells *in vivo* depleted of rpL34 (Y2907).**

591 Folding states of rRNA domains and a structure overview are shown for  
592 Nog1TAP\_L34-A in (A) and (B) and for Nog1TAP\_L34-B in (C) and (D). Structure  
593 model visualisation and protein colouring for (B) and (D) is described in the legend of  
594 Fig 2 and rRNA domain visualisation and colouring for (A) and (C) in the legend of  
595 Fig 3. In (A) - (D) the LSU subunit interface side is shown on the left and the subunit  
596 solvent surface side on the right. The individual LSU rRNA helices as well as the  
597 protein composition and model-based interaction networks detected in structure  
598 models Nog1TAP\_L34-A and Nog1TAP\_L34-B are schematically represented in  
599 figures M and N in S1 Appendix.

600

601 **Fig 5. rRNA folding states and structure models of Nog1-TAP associated**  
602 **particle populations from yeast cells *in vivo* depleted of rpL25 (Y1816).**

603 Folding states of rRNA domains and a structure overview are shown for  
604 Nog1TAP\_L25-A in (A) and (B) and for Nog1TAP\_L25-B in (C) and (D). Structure  
605 model visualisation and protein colouring for (B) and (D) is described in the legend of  
606 Fig 2 and rRNA domain visualisation and colouring for (A) and (C) in the legend of  
607 Fig 3. In (A) - (D) the LSU subunit interface side is shown on the left and the subunit



608 solvent surface side on the right. The individual LSU rRNA helices as well as the  
609 protein composition and model-based interaction networks detected in structure  
610 models Nog1TAP\_L25-A and Nog1TAP\_L25-B are schematically represented in  
611 figures K and L in S1 Appendix.

612

613 **Fig 6. rRNA folding states and structure models of Nog1-TAP associated**  
614 **particle populations from yeast cells *in vivo* depleted of rpL2 (Y1921).**

615 Folding states of rRNA domains and a structure overview are shown for  
616 Nog1TAP\_L2-A in (A) and (B), Nog1TAP\_L2-B in (C) and (D) and for Nog1TAP\_L2-  
617 C in (E) and (F). Structure model visualisation and protein colouring for (B), (D) and  
618 (F) is described in the legend of Fig 2 and rRNA domain visualisation and colouring  
619 for (A), (C) and (E) in the legend of Fig 3. In (A) - (F) the LSU subunit interface side is  
620 shown on the left and the subunit solvent surface side on the right. The individual  
621 LSU rRNA helices as well as the protein composition and model-based interaction  
622 networks detected in structure models Nog1TAP\_L2-A, Nog1TAP\_L2-B and  
623 Nog1TAP\_L2-C are schematically represented in figures H, I and J in S1 Appendix.

624

625 **Acknowledgments**

626 We thank Ralph Witzgall (Chair of Molecular and Cellular Anatomy, University of  
627 Regensburg) for providing access to the JEM-2100F and Reinhard Rachel (Centre  
628 for Electron Microscopy, University of Regensburg) for his support in operating the  
629 JEM-2100F. We thank Lifei Fu (Chair of Biophysics II, University of Regensburg) and  
630 Norbert Eichner and Gerhard Lehmann (both Chair of Biochemistry I, University of  
631 Regensburg) for their help during setup of a Relion GPU workstation. We are grateful  
632 to Christoph Engel (Structural Biochemistry, University of Regensburg) for his  
633 continuous support and willingness to share his structural biological advice. Cryo-EM  
634 image acquisition at the Titan Krios was supported by Christian Kraft in the cryo-EM-  
635 facility of the Julius-Maximilian University Würzburg (INST 92/903-1FUGG). We  
636 thank the ChimeraX-team at the RBVI for their support in Python scripting in UCSF  
637 ChimeraX, developed by the Resource for Biocomputing, Visualization, and  
638 Informatics at the University of California, San Francisco, with support from National  
639 Institutes of Health R01-GM129325 and the Office of Cyber Infrastructure and  
640 Computational Biology, National Institute of Allergy and Infectious Diseases.

641

642

643 **References**

- 644 1. Woolford JL, JR, Baserga SJ. Ribosome biogenesis in the yeast  
645 *Saccharomyces cerevisiae*. *Genetics*. 2013; 195:643–81.  
646 doi: 10.1534/genetics.113.153197 PMID: 24190922.
- 647 2. Klinge S, Woolford JL, JR. Ribosome assembly coming into focus. *Nat Rev Mol*  
648 *Cell Biol*. 2019; 20:116–31. doi: 10.1038/s41580-018-0078-y PMID: 30467428.
- 649 3. Barandun J, Hunziker M, Klinge S. Assembly and structure of the SSU  
650 processome-a nucleolar precursor of the small ribosomal subunit. *Curr Opin*  
651 *Struct Biol*. 2018; 49:85–93. Epub 2018/02/04. doi: 10.1016/j.sbi.2018.01.008  
652 PMID: 29414516.
- 653 4. Baßler J, Hurt E. Eukaryotic Ribosome Assembly. *Annu Rev Biochem*. 2019;  
654 88:281–306. Epub 2018/12/19. doi: 10.1146/annurev-biochem-013118-110817  
655 PMID: 30566372.

- 656 **5.** Chaker-Margot M, Klinge S. Assembly and early maturation of large subunit  
657 precursors. *RNA*. 2019; 25:465–71. doi: 10.1261/rna.069799.118 PMID:  
658 30670483.
- 659 **6.** Frazier MN, Pillon MC, Kocaman S, Gordon J, Stanley RE. Structural overview  
660 of macromolecular machines involved in ribosome biogenesis. *Curr Opin Struct*  
661 *Biol*. 2020; 67:51–60. Epub 2020/10/21. doi: 10.1016/j.sbi.2020.09.003 PMID:  
662 33099228.
- 663 **7.** Petrov AS, Bernier CR, Gulen B, Waterbury CC, Hershkovits E, Hsiao C, et al.  
664 Secondary structures of rRNAs from all three domains of life. *PLoS One*. 2014;  
665 9:e88222. Epub 2014/02/05. doi: 10.1371/journal.pone.0088222 PMID:  
666 24505437.
- 667 **8.** Kater L, Mitterer V, Thoms M, Cheng J, Berninghausen O, Beckmann R, et al.  
668 Construction of the Central Protuberance and L1 Stalk during 60S Subunit  
669 Biogenesis. *Mol Cell*. 2020; 79:615-628.e5. Epub 2020/07/14.  
670 doi: 10.1016/j.molcel.2020.06.032 PMID: 32668200.
- 671 **9.** Kater L, Thoms M, Barrio-Garcia C, Cheng J, Ismail S, Ahmed YL, et al.  
672 Visualizing the Assembly Pathway of Nucleolar Pre-60S Ribosomes. *Cell*. 2017;  
673 171:1599-1610.e14. doi: 10.1016/j.cell.2017.11.039 PMID: 29245012.
- 674 **10.** Sanghai ZA, Miller L, Molloy KR, Barandun J, Hunziker M, Chaker-Margot M, et  
675 al. Modular assembly of the nucleolar pre-60S ribosomal subunit. *Nature*. 2018;  
676 556:126–9. doi: 10.1038/nature26156 PMID: 29512650.
- 677 **11.** Wu S, Tutuncuoglu B, Yan K, Brown H, Zhang Y, Tan D, et al. Diverse roles of  
678 assembly factors revealed by structures of late nuclear pre-60S ribosomes.  
679 *Nature*. 2016; 534:133–7. Epub 2016/05/25. doi: 10.1038/nature17942 PMID:  
680 27251291.
- 681 **12.** Zhou Y, Musalgaonkar S, Johnson AW, Taylor DW. Tightly-orchestrated  
682 rearrangements govern catalytic center assembly of the ribosome. *Nat*  
683 *Commun*. 2019; 10:958. doi: 10.1038/s41467-019-08880-0 PMID: 30814529.
- 684 **13.** Zhou D, Zhu X, Zheng S, Tan D, Dong M-Q, Ye K. Cryo-EM structure of an early  
685 precursor of large ribosomal subunit reveals a half-assembled intermediate.  
686 *Protein Cell*. 2019; 10:120–30. doi: 10.1007/s13238-018-0526-7 PMID:  
687 29557065.
- 688 **14.** Pöll G, Müller C, Bodden M, Teubl F, Eichner N, Lehmann G, et al. Structural  
689 transitions during large ribosomal subunit maturation analyzed by tethered  
690 nuclease structure probing in *S. cerevisiae*. *PLoS One*. 2017; 12:e0179405.  
691 Epub 2017/07/07. doi: 10.1371/journal.pone.0179405 PMID: 28686620.
- 692 **15.** Burlacu E, Lackmann F, Aguilar L-C, Belikov S, van Nues R, Trahan C, et al.  
693 High-throughput RNA structure probing reveals critical folding events during  
694 early 60S ribosome assembly in yeast. *Nat Commun*. 2017; 8:714.  
695 doi: 10.1038/s41467-017-00761-8 PMID: 28959008.
- 696 **16.** Leidig C, Thoms M, Holdermann I, Bradatsch B, Berninghausen O, Bange G, et  
697 al. 60S ribosome biogenesis requires rotation of the 5S ribonucleoprotein  
698 particle. *Nat Commun*. 2014; 5:3491. doi: 10.1038/ncomms4491 PMID:  
699 24662372.
- 700 **17.** Kargas V, Castro-Hartmann P, Escudero-Urquijo N, Dent K, Hilcenko C, Sailer  
701 C, et al. Mechanism of completion of peptidyltransferase centre assembly in  
702 eukaryotes. *Elife*. 2019; 8. doi: 10.7554/eLife.44904 PMID: 31115337.

- 703 **18.** Ma C, Wu S, Li N, Chen Y, Yan K, Li Z, et al. Structural snapshot of cytoplasmic  
704 pre-60S ribosomal particles bound by Nmd3, Lsg1, Tif6 and Reh1. *Nat Struct*  
705 *Mol Biol.* 2017; 24:214–20. doi: 10.1038/nsmb.3364 PMID: 28112732.
- 706 **19.** Malyutin AG, Musalgaonkar S, Patchett S, Frank J, Johnson AW. Nmd3 is a  
707 structural mimic of eIF5A, and activates the cpGTPase Lsg1 during 60S  
708 ribosome biogenesis. *EMBO J.* 2017; 36:854–68.  
709 doi: 10.15252/embj.201696012 PMID: 28179369.
- 710 **20.** La Cruz J de, Karbstein K, Woolford JL, JR. Functions of ribosomal proteins in  
711 assembly of eukaryotic ribosomes in vivo. *Annu Rev Biochem.* 2015; 84:93–129.  
712 doi: 10.1146/annurev-biochem-060614-033917 PMID: 25706898.
- 713 **21.** Pöll G, Braun T, Jakovljevic J, Neueder A, Jakob S, Woolford JL, JR, et al. rRNA  
714 maturation in yeast cells depleted of large ribosomal subunit proteins. *PLoS*  
715 *One.* 2009; 4:e8249. doi: 10.1371/journal.pone.0008249 PMID: 20011513.
- 716 **22.** Jakovljevic J, Ohmayer U, Gamalinda M, Talkish J, Alexander L, Linnemann J,  
717 et al. Ribosomal proteins L7 and L8 function in concert with six A<sub>3</sub> assembly  
718 factors to propagate assembly of domains I and II of 25S rRNA in yeast 60S  
719 ribosomal subunits. *RNA.* 2012; 18:1805–22. doi: 10.1261/rna.032540.112  
720 PMID: 22893726.
- 721 **23.** Gamalinda M, Ohmayer U, Jakovljevic J, Kumcuoglu B, Woolford J, Mbom B, et  
722 al. A hierarchical model for assembly of eukaryotic 60S ribosomal subunit  
723 domains. *Genes Dev.* 2014; 28:198–210. doi: 10.1101/gad.228825.113 PMID:  
724 24449272.
- 725 **24.** Ohmayer U. Studies on the assembly process of large subunit ribosomal  
726 proteins in *S.cerevisiae*, Universität Regensburg. 2015.
- 727 **25.** Ohmayer U, Gamalinda M, Sauert M, Ossowski J, Pöll G, Linnemann J, et al.  
728 Studies on the assembly characteristics of large subunit ribosomal proteins in *S.*  
729 *cerevisiae*. *PLoS One.* 2013; 8:e68412. doi: 10.1371/journal.pone.0068412  
730 PMID: 23874617.
- 731 **26.** Ohmayer U, Gil-Hernández Á, Sauert M, Martín-Marcos P, Tamame M,  
732 Tschochner H, et al. Studies on the Coordination of Ribosomal Protein  
733 Assembly Events Involved in Processing and Stabilization of Yeast Early Large  
734 Ribosomal Subunit Precursors. *PLoS One.* 2015; 10:e0143768. Epub  
735 2015/12/07. doi: 10.1371/journal.pone.0143768 PMID: 26642313.
- 736 **27.** Espinar-Marchena F, Rodríguez-Galán O, Fernández-Fernández J, Linnemann  
737 J, La Cruz J de. Ribosomal protein L14 contributes to the early assembly of 60S  
738 ribosomal subunits in *Saccharomyces cerevisiae*. *Nucleic Acids Res.* 2018;  
739 46:4715–32. doi: 10.1093/nar/gky123 PMID: 29788267.
- 740 **28.** Kim H, Abeyirigunawardena SC, Chen K, Mayerle M, Ragunathan K, Luthey-  
741 Schulten Z, et al. Protein-guided RNA dynamics during early ribosome  
742 assembly. *Nature.* 2014; 506:334–8. Epub 2014/02/12.  
743 doi: 10.1038/nature13039 PMID: 24522531.
- 744 **29.** Klinge S, Voigts-Hoffmann F, Leibundgut M, Ban N. Atomic structures of the  
745 eukaryotic ribosome. *Trends Biochem Sci.* 2012; 37:189–98. Epub 2012/03/20.  
746 doi: 10.1016/j.tibs.2012.02.007 PMID: 22436288.
- 747 **30.** Ban N, Beckmann R, Cate JHD, Dinman JD, Dragon F, Ellis SR, et al. A new  
748 system for naming ribosomal proteins. *Curr Opin Struct Biol.* 2014; 24:165–9.  
749 Epub 2014/02/10. doi: 10.1016/j.sbi.2014.01.002 PMID: 24524803.

- 750 **31.** Babiano R, Gamalinda M, Woolford JL, JR, La Cruz J de. *Saccharomyces*  
751 *cerevisiae* ribosomal protein L26 is not essential for ribosome assembly and  
752 function. *Mol Cell Biol.* 2012; 32:3228–41. doi: 10.1128/MCB.00539-12 PMID:  
753 22688513.
- 754 **32.** Talkish J, May G, Lin Y, Woolford JL, JR, McManus CJ. Mod-seq: high-  
755 throughput sequencing for chemical probing of RNA structure. *RNA.* 2014;  
756 20:713–20. doi: 10.1261/rna.042218.113 PMID: 24664469.
- 757 **33.** Mitterer V, Shayan R, Ferreira-Cerca S, Murat G, Enne T, Rinaldi D, et al.  
758 Conformational proofreading of distant 40S ribosomal subunit maturation events  
759 by a long-range communication mechanism. *Nat Commun.* 2019; 10:2754. Epub  
760 2019/06/21. doi: 10.1038/s41467-019-10678-z PMID: 31227701.
- 761 **34.** Wilson DM, Li Y, LaPeruta A, Gamalinda M, Gao N, Woolford JL, JR. Structural  
762 insights into assembly of the ribosomal nascent polypeptide exit tunnel. *Nat*  
763 *Commun.* 2020; 11:5111. doi: 10.1038/s41467-020-18878-8 PMID: 33037216.
- 764 **35.** van Beekvelt CA, Graaff-Vincent M de, Faber AW, van't Riet J, Venema J, Raué  
765 HA. All three functional domains of the large ribosomal subunit protein L25 are  
766 required for both early and late pre-rRNA processing steps in *Saccharomyces*  
767 *cerevisiae*. *Nucleic Acids Res.* 2001; 29:5001–8. doi: 10.1093/nar/29.24.5001  
768 PMID: 11812830.
- 769 **36.** Saveanu C, Namane A, Gleizes P-E, Lebreton A, Rousselle J-C, Noaillac-  
770 Depeyre J, et al. Sequential protein association with nascent 60S ribosomal  
771 particles. *Mol Cell Biol.* 2003; 23:4449–60. doi: 10.1128/mcb.23.13.4449-  
772 4460.2003 PMID: 12808088.
- 773 **37.** Rutgers CA, Schaap PJ, van 't Riet J, Woldringh CL, Raué HA. In vivo and in  
774 vitro analysis of structure-function relationships in ribosomal protein L25 from  
775 *Saccharomyces cerevisiae*. *Biochimica et Biophysica Acta (BBA) - Gene*  
776 *Structure and Expression.* 1990; 1050:74–9. doi: 10.1016/0167-4781(90)90144-  
777 Q.
- 778 **38.** Klingauf-Nerurkar P, Gillet LC, Portugal-Calisto D, Oborská-Oplová M, Jäger M,  
779 Schubert OT, et al. The GTPase Nog1 co-ordinates the assembly, maturation  
780 and quality control of distant ribosomal functional centers. *Elife.* 2020; 9.  
781 doi: 10.7554/eLife.52474 PMID: 31909713.
- 782 **39.** Fromm L, Falk S, Flemming D, Schuller JM, Thoms M, Conti E, et al.  
783 Reconstitution of the complete pathway of ITS2 processing at the pre-ribosome.  
784 *Nat Commun.* 2017; 8:1787. doi: 10.1038/s41467-017-01786-9 PMID:  
785 29176610.
- 786 **40.** Rutgers CA, Rientjes JM, van 't Riet J, Raué HA. rRNA binding domain of yeast  
787 ribosomal protein L25. *Journal of Molecular Biology.* 1991; 218:375–85.  
788 doi: 10.1016/0022-2836(91)90719-M.
- 789 **41.** Kooi EA, Rutgers CA, Kleijmeer MJ, van 't Riet J, Venema J, Raué HA.  
790 Mutational analysis of the C-terminal region of *Saccharomyces cerevisiae*  
791 ribosomal protein L25 in vitro and in vivo demonstrates the presence of two  
792 distinct functional elements. *Journal of Molecular Biology.* 1994; 240:243–55.  
793 doi: 10.1006/jmbi.1994.1438 PMID: 8028007.
- 794 **42.** Beekvelt, C.A. van, et al. Domain III of *Saccharomyces cerevisiae* 25 S  
795 Ribosomal RNA: Its Role in Binding of Ribosomal Protein L25 and 60 S Subunit  
796 Formation.



- 797 **43.** Kooi EA, Rutgers CA, Mulder A, van't Riet J, Venema J, Raué HA. The  
798 phylogenetically conserved doublet tertiary interaction in domain III of the large  
799 subunit rRNA is crucial for ribosomal protein binding. *Proc Natl Acad Sci U S A.*  
800 1993; 90:213–6. doi: 10.1073/pnas.90.1.213 PMID: 8419926.
- 801 **44.** Granneman S, Petfalski E, Tollervey D. A cluster of ribosome synthesis factors  
802 regulate pre-rRNA folding and 5.8S rRNA maturation by the Rat1 exonuclease.  
803 *EMBO J.* 2011; 30:4006–19. Epub 2011/08/02. doi: 10.1038/emboj.2011.256  
804 PMID: 21811236.
- 805 **45.** Sahasranaman A, Dembowski J, Strahler J, Andrews P, Maddock J, Woolford  
806 JL, JR. Assembly of *Saccharomyces cerevisiae* 60S ribosomal subunits: role of  
807 factors required for 27S pre-rRNA processing. *EMBO J.* 2011; 30:4020–32.  
808 doi: 10.1038/emboj.2011.338 PMID: 21926967.
- 809 **46.** Micic J, Li Y, Wu S, Wilson D, Tutuncuoglu B, Gao N, et al. Coupling of 5S RNP  
810 rotation with maturation of functional centers during large ribosomal subunit  
811 assembly. *Nat Commun.* 2020; 11:3751. doi: 10.1038/s41467-020-17534-5  
812 PMID: 32719344.
- 813 **47.** Bresson S, Tollervey D. Surveillance-ready transcription: nuclear RNA decay as  
814 a default fate. *Open Biol.* 2018; 8. doi: 10.1098/rsob.170270 PMID: 29563193.
- 815 **48.** Puig O, Caspary F, Rigaut G, Rutz B, Bouveret E, Bragado-Nilsson E, et al. The  
816 tandem affinity purification (TAP) method: a general procedure of protein  
817 complex purification. *Methods.* 2001; 24:218–29. doi: 10.1006/meth.2001.1183  
818 PMID: 11403571.
- 819 **49.** Jakob S, Ohmayer U, Neueder A, Hierlmeier T, Perez-Fernandez J, Hochmuth  
820 E, et al. Interrelationships between yeast ribosomal protein assembly events and  
821 transient ribosome biogenesis factors interactions in early pre-ribosomes. *PLoS*  
822 *One.* 2012; 7:e32552. Epub 2012/03/14. doi: 10.1371/journal.pone.0032552  
823 PMID: 22431976.
- 824 **50.** Oeffinger M, Wei KE, Rogers R, DeGrasse JA, Chait BT, Aitchison JD, et al.  
825 Comprehensive analysis of diverse ribonucleoprotein complexes. *Nat Methods.*  
826 2007; 4:951–6. Epub 2007/10/07. doi: 10.1038/nmeth1101 PMID: 17922018.
- 827 **51.** Song B, Lenhart J, Flegler VJ, Makbul C, Rasmussen T, Böttcher B. Capabilities  
828 of the Falcon III detector for single-particle structure determination.  
829 *Ultramicroscopy.* 2019; 203:145–54. Epub 2019/01/28.  
830 doi: 10.1016/j.ultramic.2019.01.002 PMID: 30738626.
- 831 **52.** Schmitt ME, Brown TA, Trumpower BL. A rapid and simple method for  
832 preparation of RNA from *Saccharomyces cerevisiae*. *Nucleic Acids Res.* 1990;  
833 18:3091–2. doi: 10.1093/nar/18.10.3091 PMID: 2190191.
- 834 **53.** Sambrook J, Fritsch EF, Maniatis T. *Molecular cloning. A laboratory manual.*  
835 2nd ed. Cold Spring Harbor, N.Y.: Cold Spring Harbor Laboratory Press; 1989.
- 836 **54.** Zivanov J, Nakane T, Forsberg BO, Kimanius D, Hagen WJ, Lindahl E, et al.  
837 New tools for automated high-resolution cryo-EM structure determination in  
838 RELION-3. *Elife.* 2018; 7. Epub 2018/11/09. doi: 10.7554/eLife.42166 PMID:  
839 30412051.
- 840 **55.** Zheng SQ, Palovcak E, Armache J-P, Verba KA, Cheng Y, Agard DA.  
841 MotionCor2: anisotropic correction of beam-induced motion for improved cryo-  
842 electron microscopy. *Nat Methods.* 2017; 14:331–2. Epub 2017/02/27.  
843 doi: 10.1038/nmeth.4193 PMID: 28250466.

- 844 **56.** Rohou A, Grigorieff N. CTFIND4: Fast and accurate defocus estimation from  
845 electron micrographs. *J Struct Biol.* 2015; 192:216–21. Epub 2015/08/13.  
846 doi: 10.1016/j.jsb.2015.08.008 PMID: 26278980.
- 847 **57.** Terwilliger TC, Ludtke SJ, Read RJ, Adams PD, Afonine PV. Improvement of  
848 cryo-EM maps by density modification. *Nat Methods.* 2020; 17:923–7. Epub  
849 2020/08/17. doi: 10.1038/s41592-020-0914-9 PMID: 32807957.
- 850 **58.** Liebschner D, Afonine PV, Baker ML, Bunkóczi G, Chen VB, Croll TI, et al.  
851 Macromolecular structure determination using X-rays, neutrons and electrons:  
852 recent developments in Phenix. *Acta Crystallogr D Struct Biol.* 2019; 75:861–77.  
853 Epub 2019/10/02. doi: 10.1107/S2059798319011471 PMID: 31588918.
- 854 **59.** Pettersen EF, Goddard TD, Huang CC, Couch GS, Greenblatt DM, Meng EC, et  
855 al. UCSF Chimera--a visualization system for exploratory research and analysis.  
856 *J Comput Chem.* 2004; 25:1605–12. doi: 10.1002/jcc.20084 PMID: 15264254.
- 857 **60.** Pettersen EF, Goddard TD, Huang CC, Meng EC, Couch GS, Croll TI, et al.  
858 UCSF ChimeraX: Structure visualization for researchers, educators, and  
859 developers. *Protein Sci.* 2021; 30:70–82. Epub 2020/10/22.  
860 doi: 10.1002/pro.3943 PMID: 32881101.
- 861 **61.** Croll TI. ISOLDE: a physically realistic environment for model building into low-  
862 resolution electron-density maps. *Acta Crystallogr D Struct Biol.* 2018; 74:519–  
863 30. Epub 2018/04/11. doi: 10.1107/S2059798318002425 PMID: 29872003.
- 864 **62.** Shannon P, Markiel A, Ozier O, Baliga NS, Wang JT, Ramage D, et al.  
865 Cytoscape: a software environment for integrated models of biomolecular  
866 interaction networks. *Genome Res.* 2003; 13:2498–504.  
867 doi: 10.1101/gr.1239303 PMID: 14597658.
- 868 **63.** Garreau de Loubresse N, Prokhorova I, Holtkamp W, Rodnina MV, Yusupova G,  
869 Yusupov M. Structural basis for the inhibition of the eukaryotic ribosome. *Nature.*  
870 2014; 513:517–22. Epub 2014/09/10. doi: 10.1038/nature13737 PMID:  
871 25209664.

## 872 **Supporting information captions**

### 873 **S1 Appendix. Schematic representation of rRNA helices, protein composition** 874 **and predicted major interaction interfaces in the mature LSU and in single** 875 **particle cryo-EM derived structure models.**

876 Individual proteins are represented by rounded corners, groups of proteins by  
877 rectangles with sharp corners. Definition of multi-component r-protein clusters  
878 designated Cl\_D1-D5, Cl\_D1-D2, Cl\_D2-D6 and Cluster Cl\_D3 and Cl\_L2-L43 is  
879 shown in figure (A) and is based on protein - protein interactions and functional  
880 categories. These are symbolized for all proteins by the colour of the border of the  
881 rectangles: proteins required for early pre-rRNA processing are represented by black  
882 bordered rectangles, for intermediate nuclear pre-rRNA processing steps by blue, for  
883 late nuclear pre-rRNA processing steps by green and for downstream nuclear  
884 maturation and export by red bordered rectangles. Boxes for proteins with unclear  
885 function and non-essential proteins have grey borders, with the latter ones in dotted  
886 lines (see also S6 Appendix for definition of functional categories). Interactions  
887 between individual proteins, groups of proteins and rRNA domains were deduced  
888 from residue - residue proximities in the structure models (see Materials and  
889 Methods). Predicted major interaction interfaces with  $\geq 10$  residues  
890 involved (respective numbers are shown, sums of residues in both partners) are  
891

893 visualized between r-protein (groups) by grey lines, between (groups of) factors by  
894 white lines and between factors and r-proteins by interrupted lines. For r-protein  
895 interactions with r-proteins also the ones involving less than 10 residues are  
896 visualized and the number behind the slash is the one observed in the mature LSU  
897 structure model 4u3u. Numbers falling below 50% of the ones deduced for pdb-  
898 databank entry 4u3u are highlighted in red. Predicted interactions of proteins with  
899 rRNA domains are shown as bar diagrams inside protein boxes (relative amounts).  
900 Colour code and order of rRNA domains in these diagrams are reflected in the bar  
901 diagram at the bottom of each figure. Here, the percent of residues of each rRNA  
902 helix which was observed in the respective model is represented. More details on  
903 residues modelled for individual proteins and RNA helices and their predicted  
904 interactions can be found in S6 Appendix (proteins) and S7 Appendix (RNA helices).

905

## 906 **S2 Appendix. Growth of yeast conditional r-protein expression mutants on** 907 **galactose and glucose containing medium.**

908 Yeast strains BY4742 (lane 1), Y1877 (lane 2), Y1816 (lane 3), Y1921 (lane 4) and  
909 Y2907 (lane 5) were cultivated in galactose containing liquid full medium at 30°C and  
910 serial dilutions were then spotted on galactose (YPG) or glucose containing (YPD)  
911 solid medium. Images were taken after 72h incubation at 30 °C.

912

## 913 **S3 Appendix. Cryo-EM data collection parameters, map resolutions, accession** 914 **numbers and model parameters for cryo-em based structure models described** 915 **in this work.**

916 Map resolution estimates (half maps, fourier shell correlation threshold 0.143) are  
917 given as reported by relion (user-created mask) and by phenix validation tools (no  
918 user-created mask). Model statistics as reported by phenix validation tools and  
919 accession numbers for models (wwPDB), related density maps (EMDB) and for full  
920 EM-datasets (EMPIAR) are indicated. Fourier shell correlation (FSC) graphs as  
921 reported by phenix validation tools are shown in S4 Appendix.

922

## 923 **S4 Appendix. FSC graphs for cryo-EM based density maps analyzed in this** 924 **work as reported by phenix validation tools.**

925

## 926 **S5 Appendix. Single particle sorting and processing schemes for cryo-EM** 927 **datasets recorded in this study.**

928 White numbers in 3D classification views indicate particle counts in the respective  
929 classes. Data processing schemes are shown for Nog1-TAP associated particles  
930 from strain Y1877 in (A), strain Y1921 in (B), strain Y1816 in (C) and Y2907 in (D). All  
931 shown intermediate and final density maps obtained by Relion's 3D-Autorefine  
932 procedure are represented using the same dimensions and orientation.

933

## 934 **S6 Appendix. Structure models: protein data.**

935 Excel table with chain and protein names, modelled residues and model-data based  
936 predictions for interactions with other (groups of) proteins, rRNA domains and  
937 individual rRNA helices for each of the described models and for the LSU in pdb  
938 entry 4u3u. The number of residues involved in predicted interactions are shown in  
939 brackets (unidirectional). Literature based functional classification for modelled  
940 proteins are given in the Excel table's tab named "Functional categories".

941

## 942 **S7 Appendix. Structure models: RNA data.**

943 Excel table listing for all models and for the LSU in pdb entry 4u3u for each LSU  
944 rRNA helix the modeled residues and the model-data based predictions for  
945 interactions with (groups of) proteins, rRNA domains and individual rRNA helices  
946 (unidirectional). The number of residues involved in predicted interactions are shown  
947 in brackets.  
948  
949  
950



**A**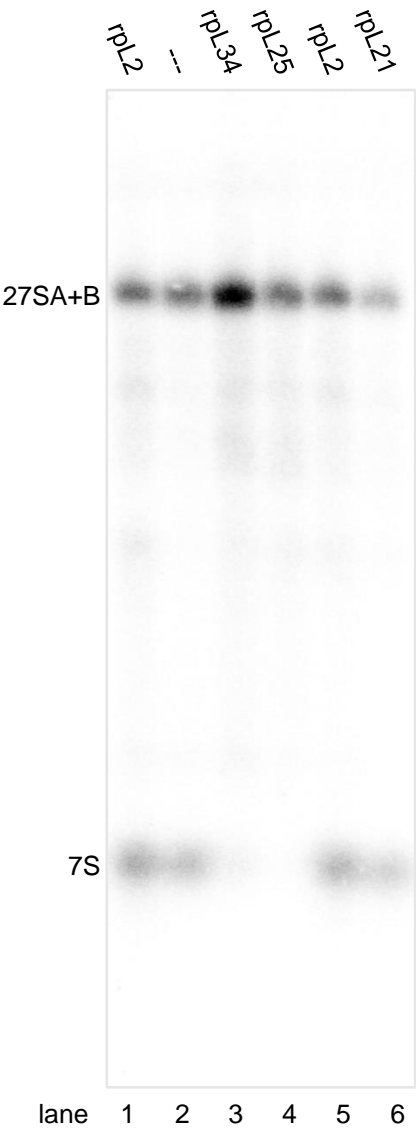**B**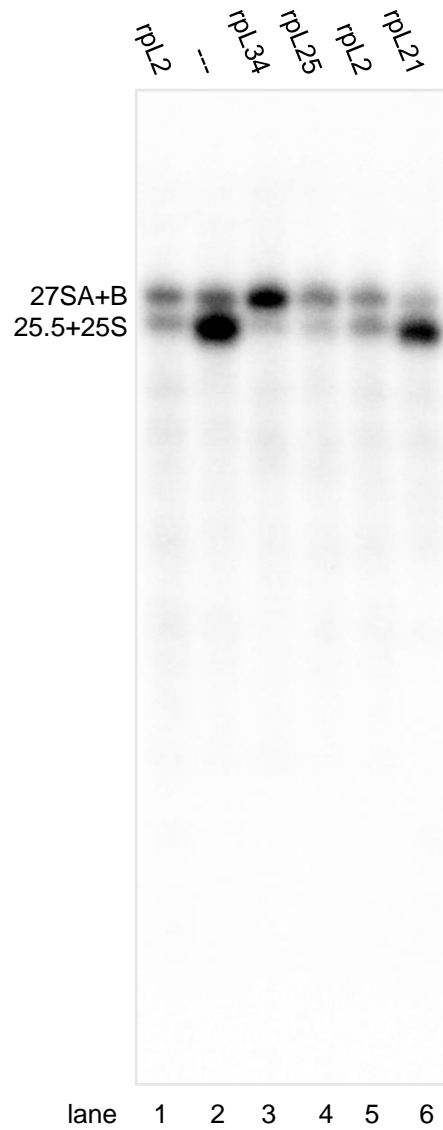**C**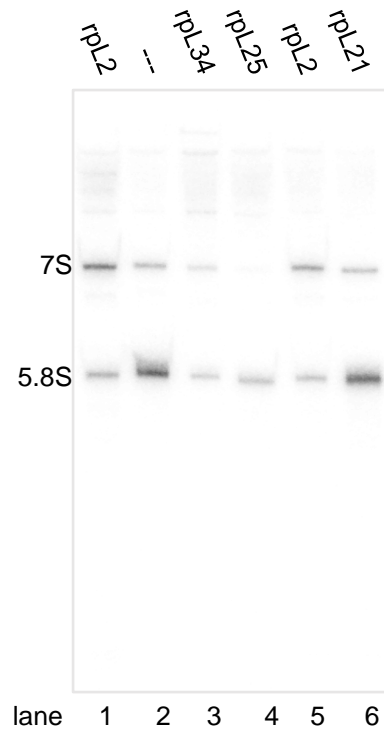

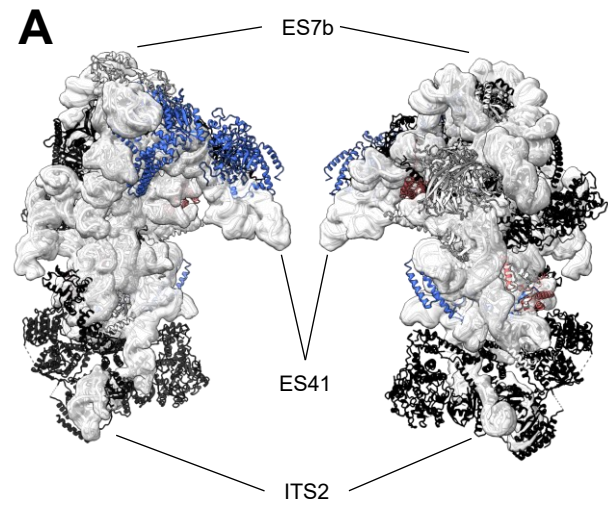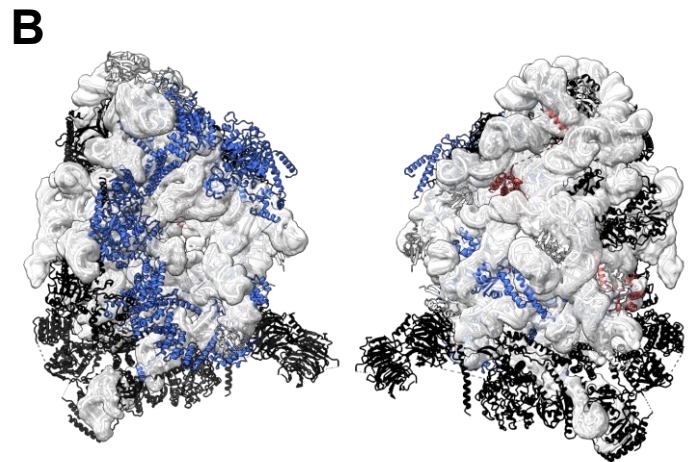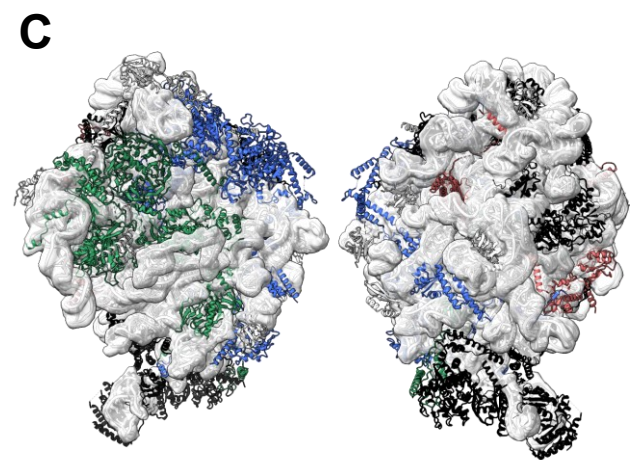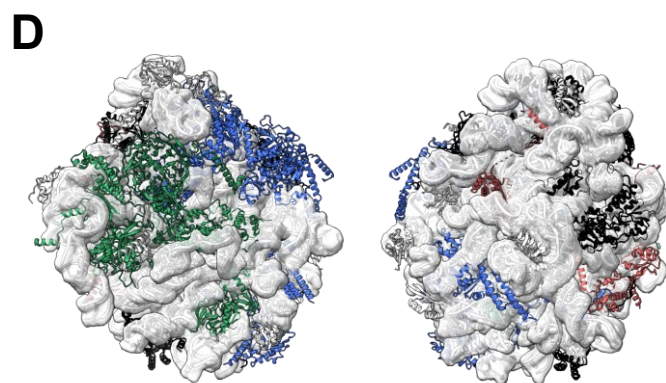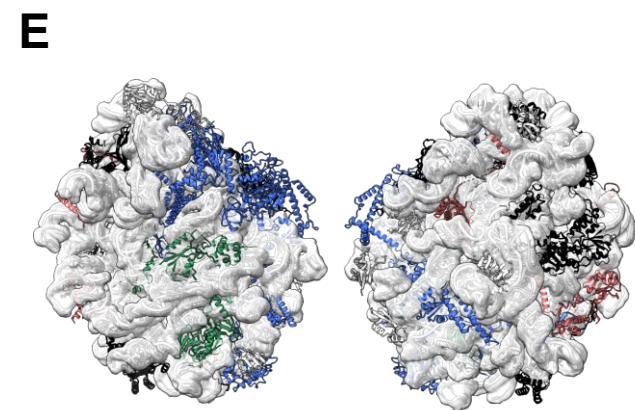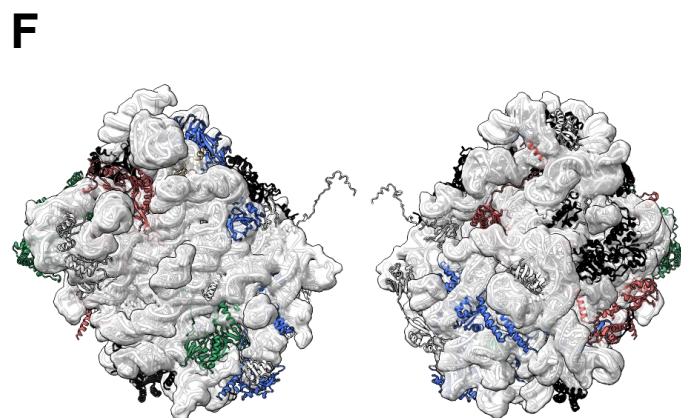

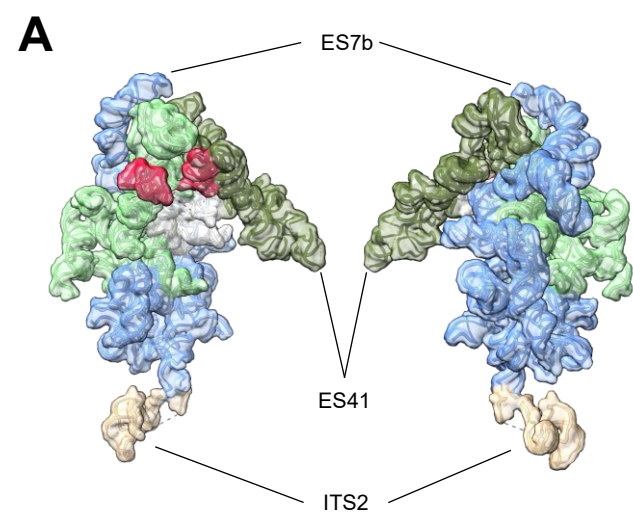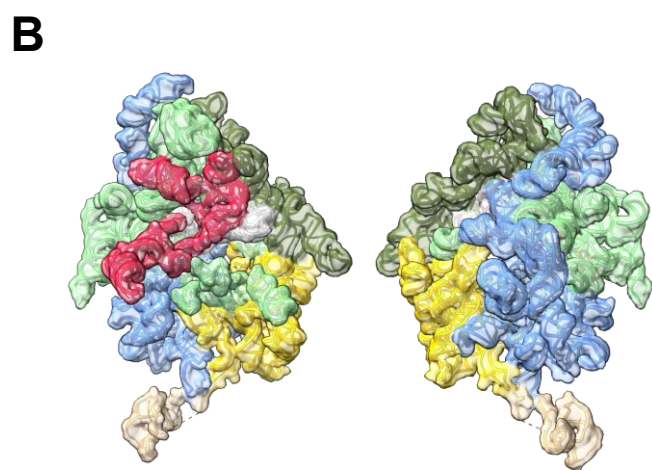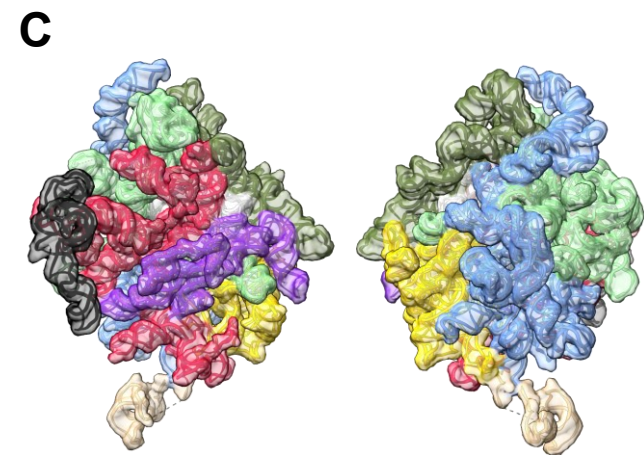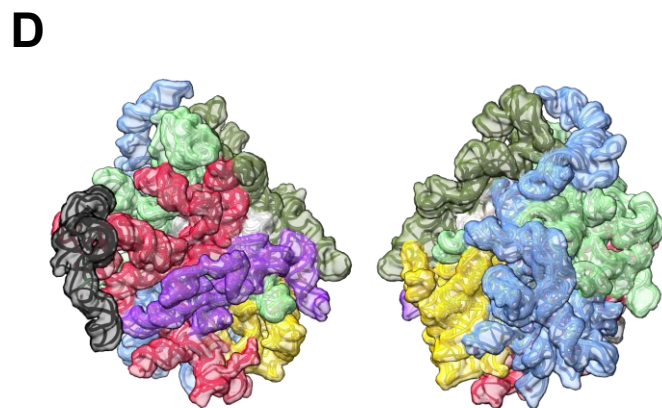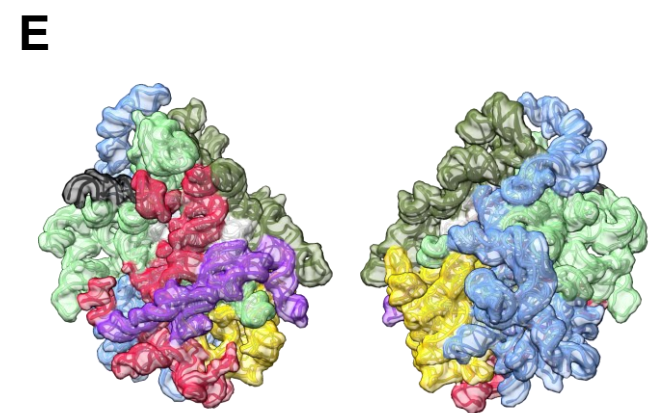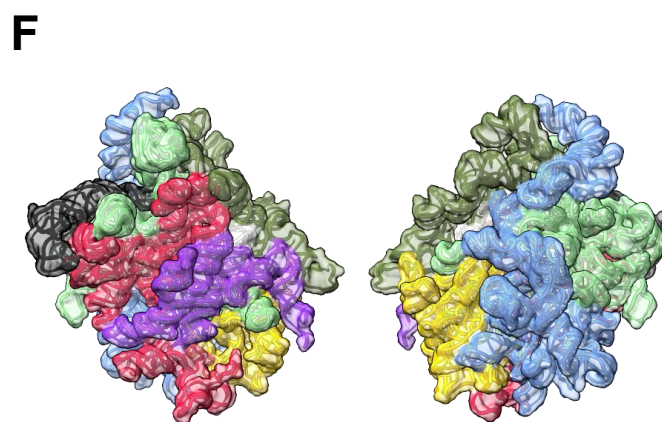



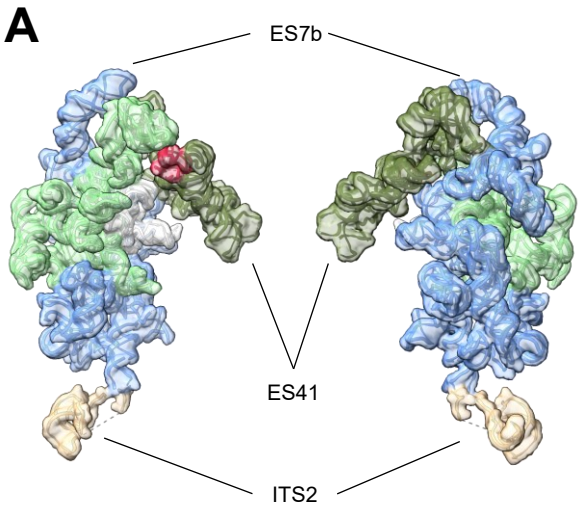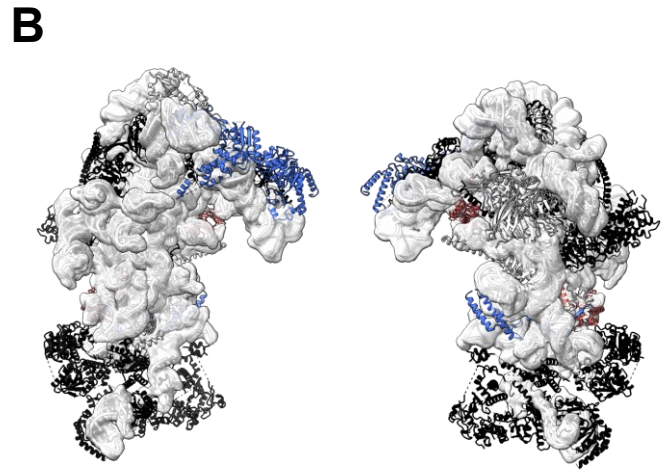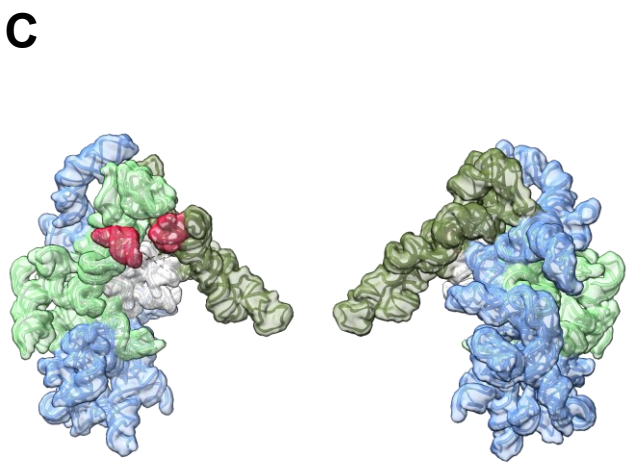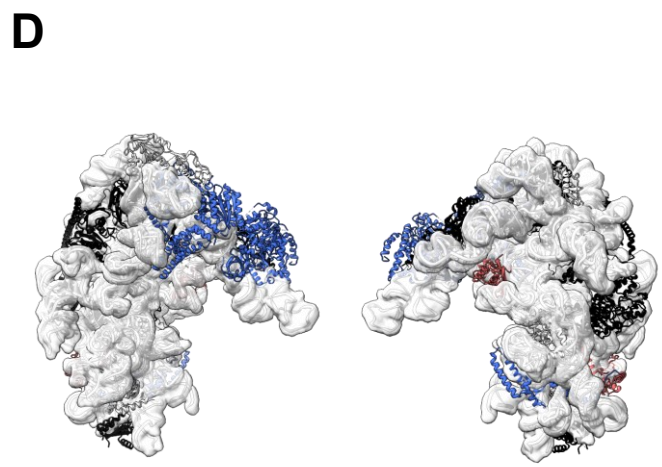



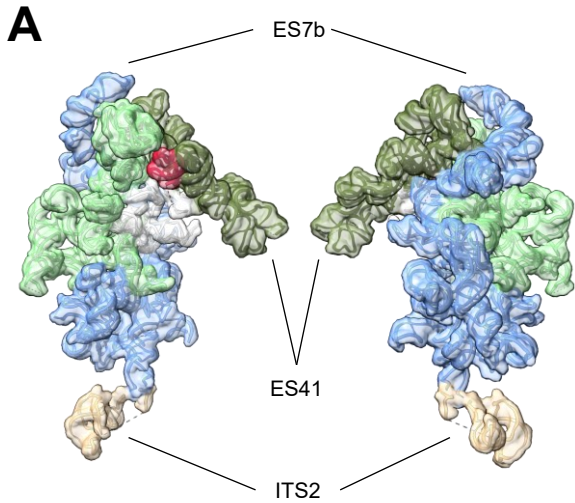

**B**

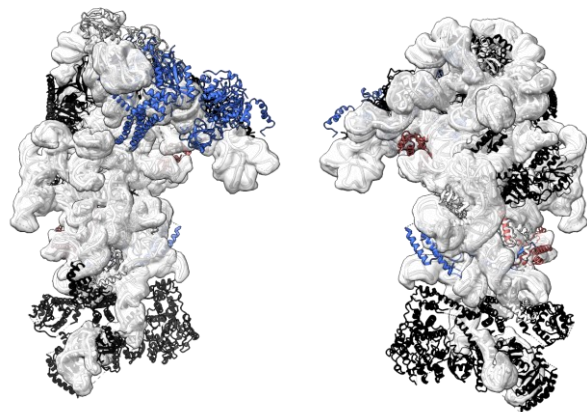

**C**

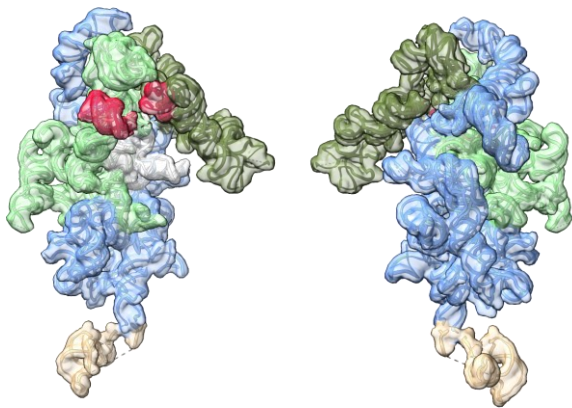

**D**

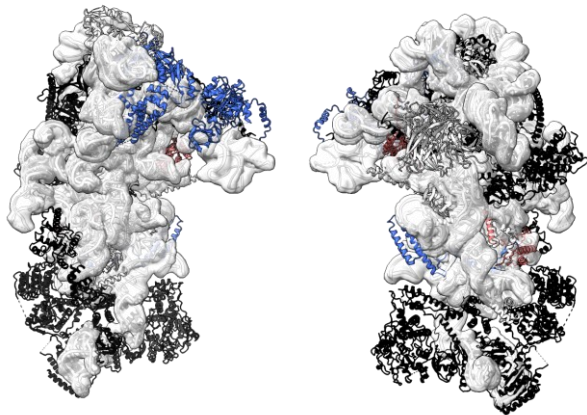

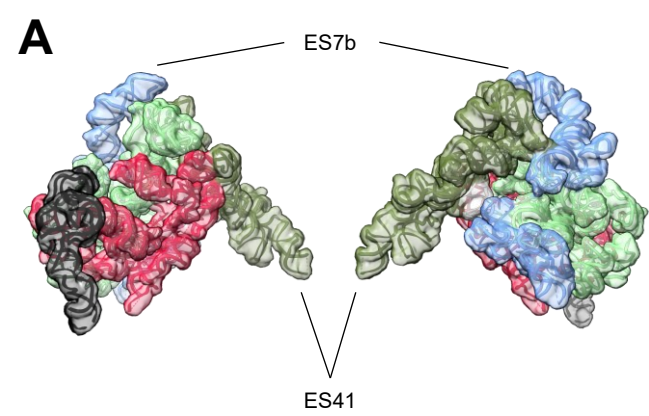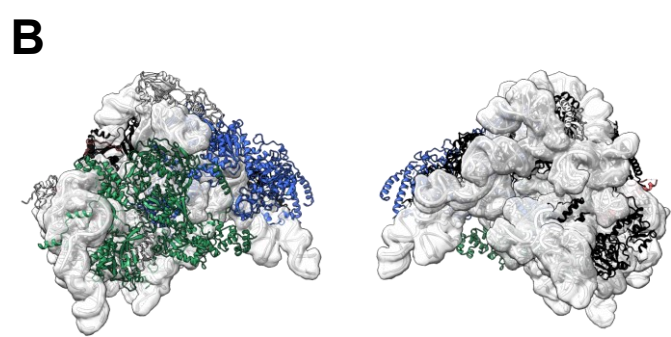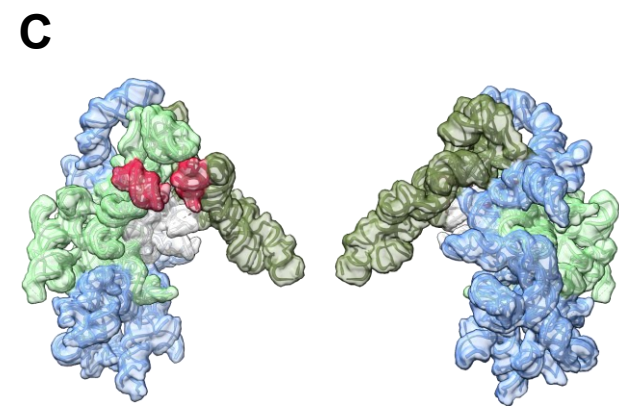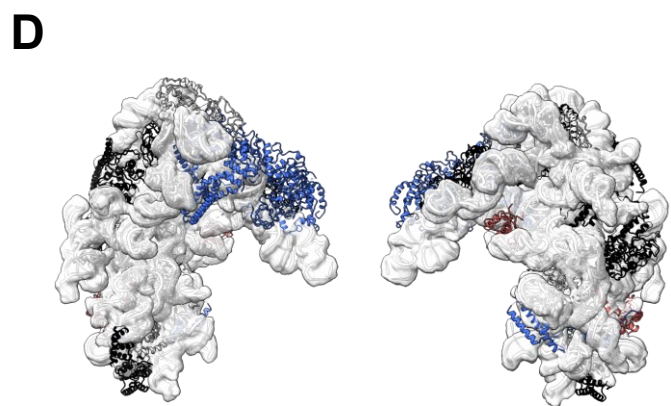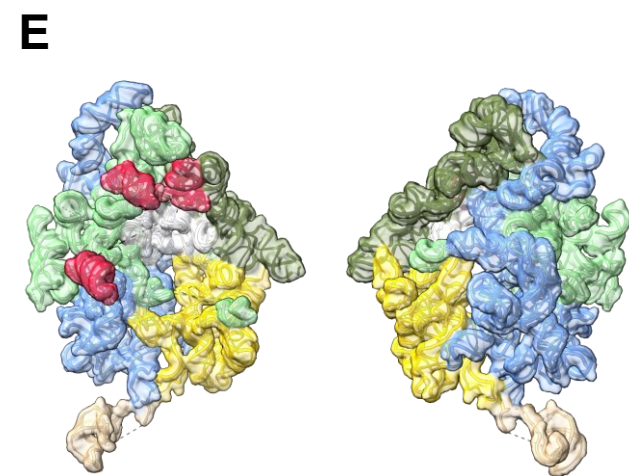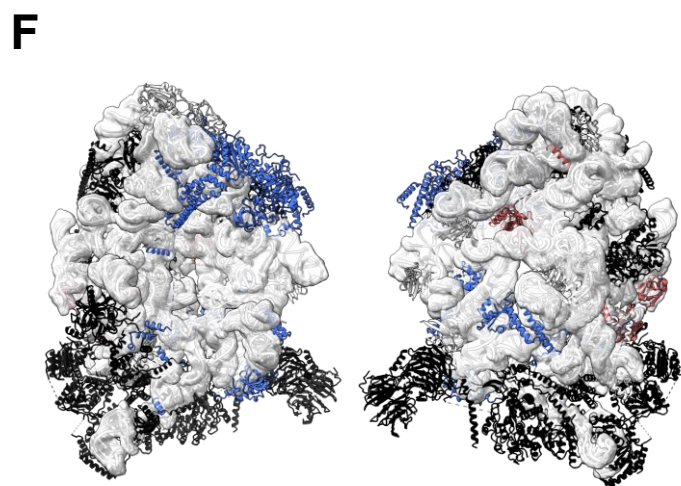

# A) Mature LSU, r-protein clusters not collapsed

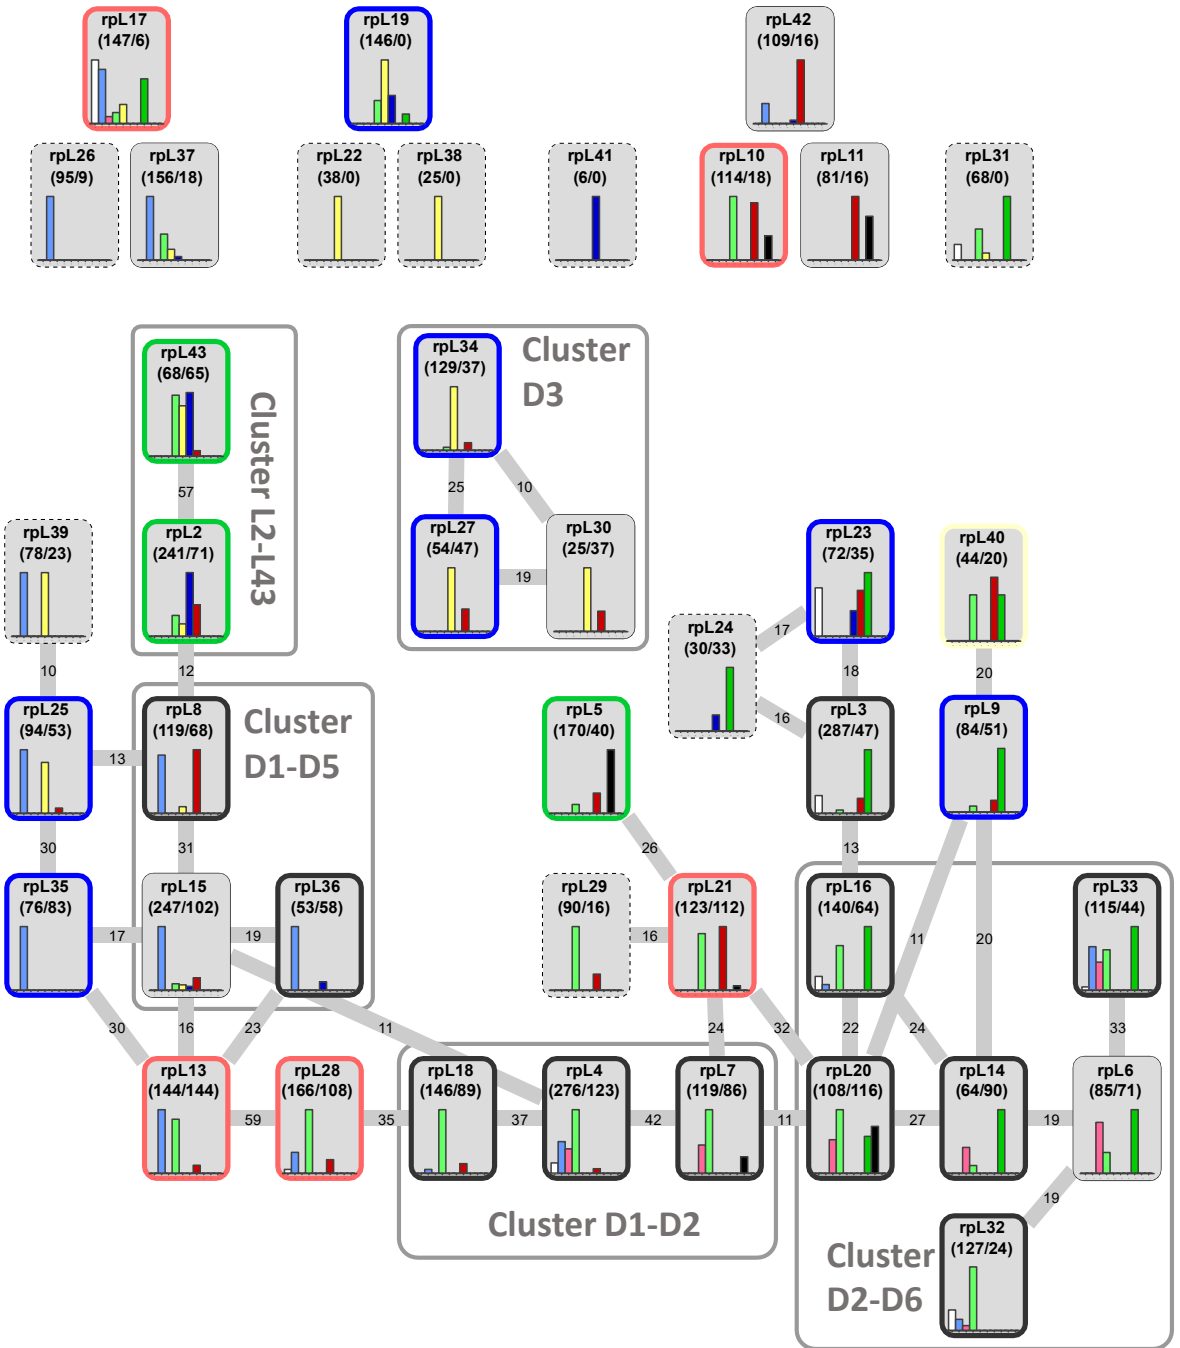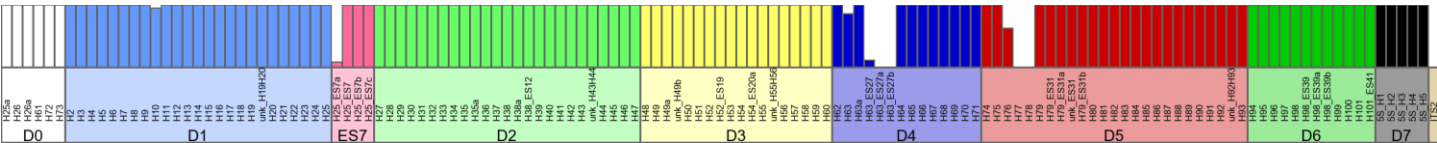

# B) Mature LSU, r-protein clusters collapsed

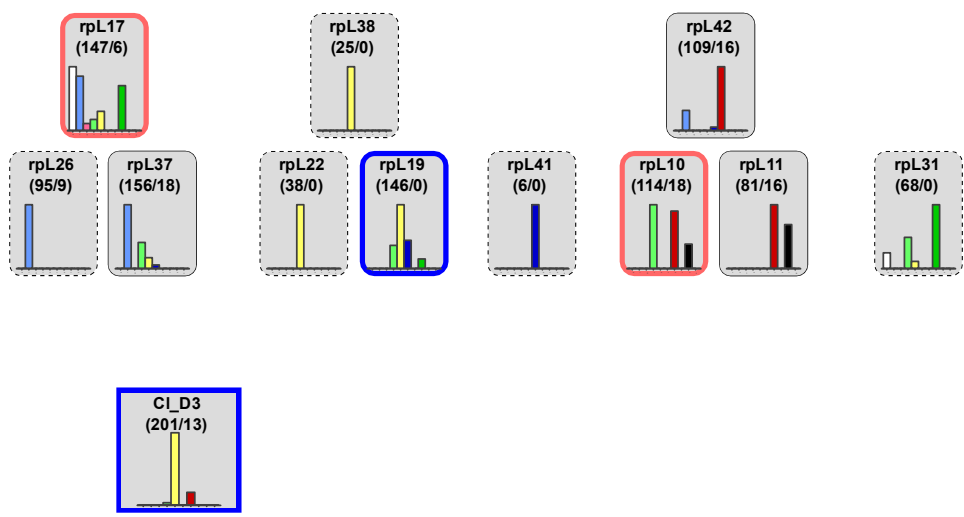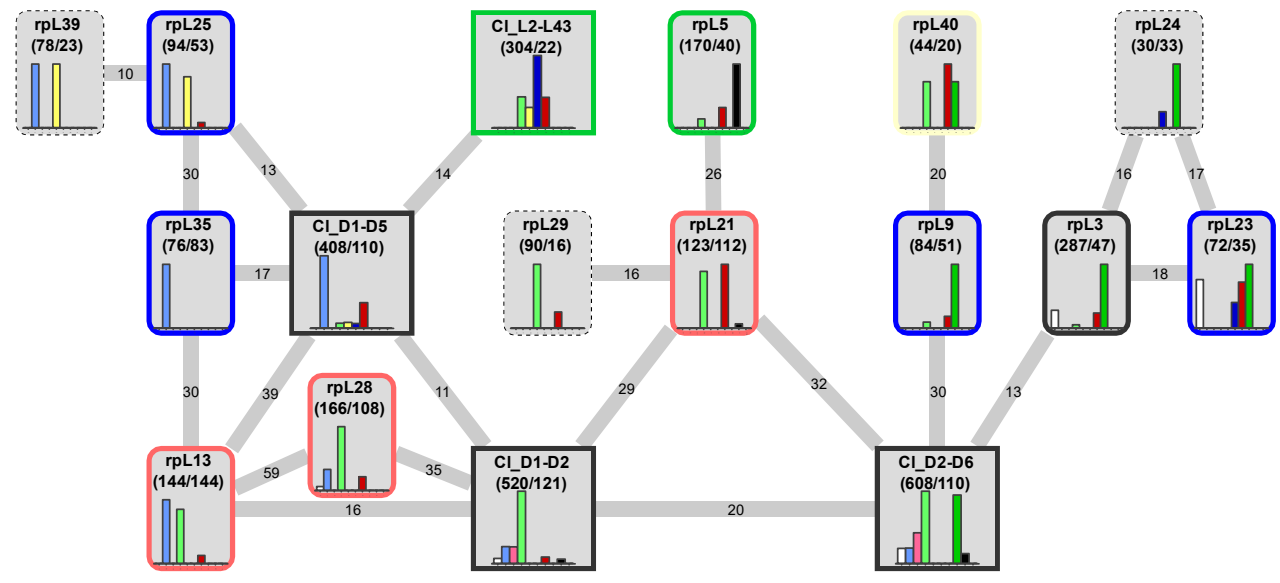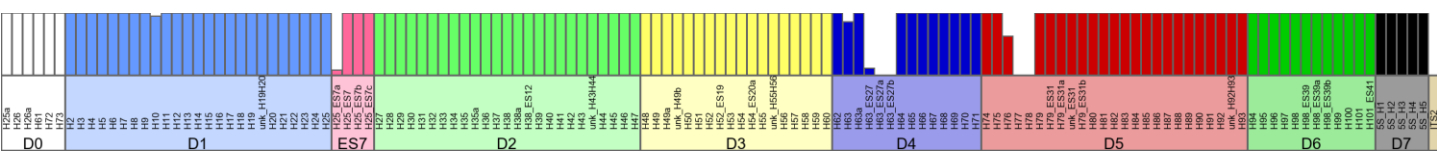



# C) Nog1TAP-A

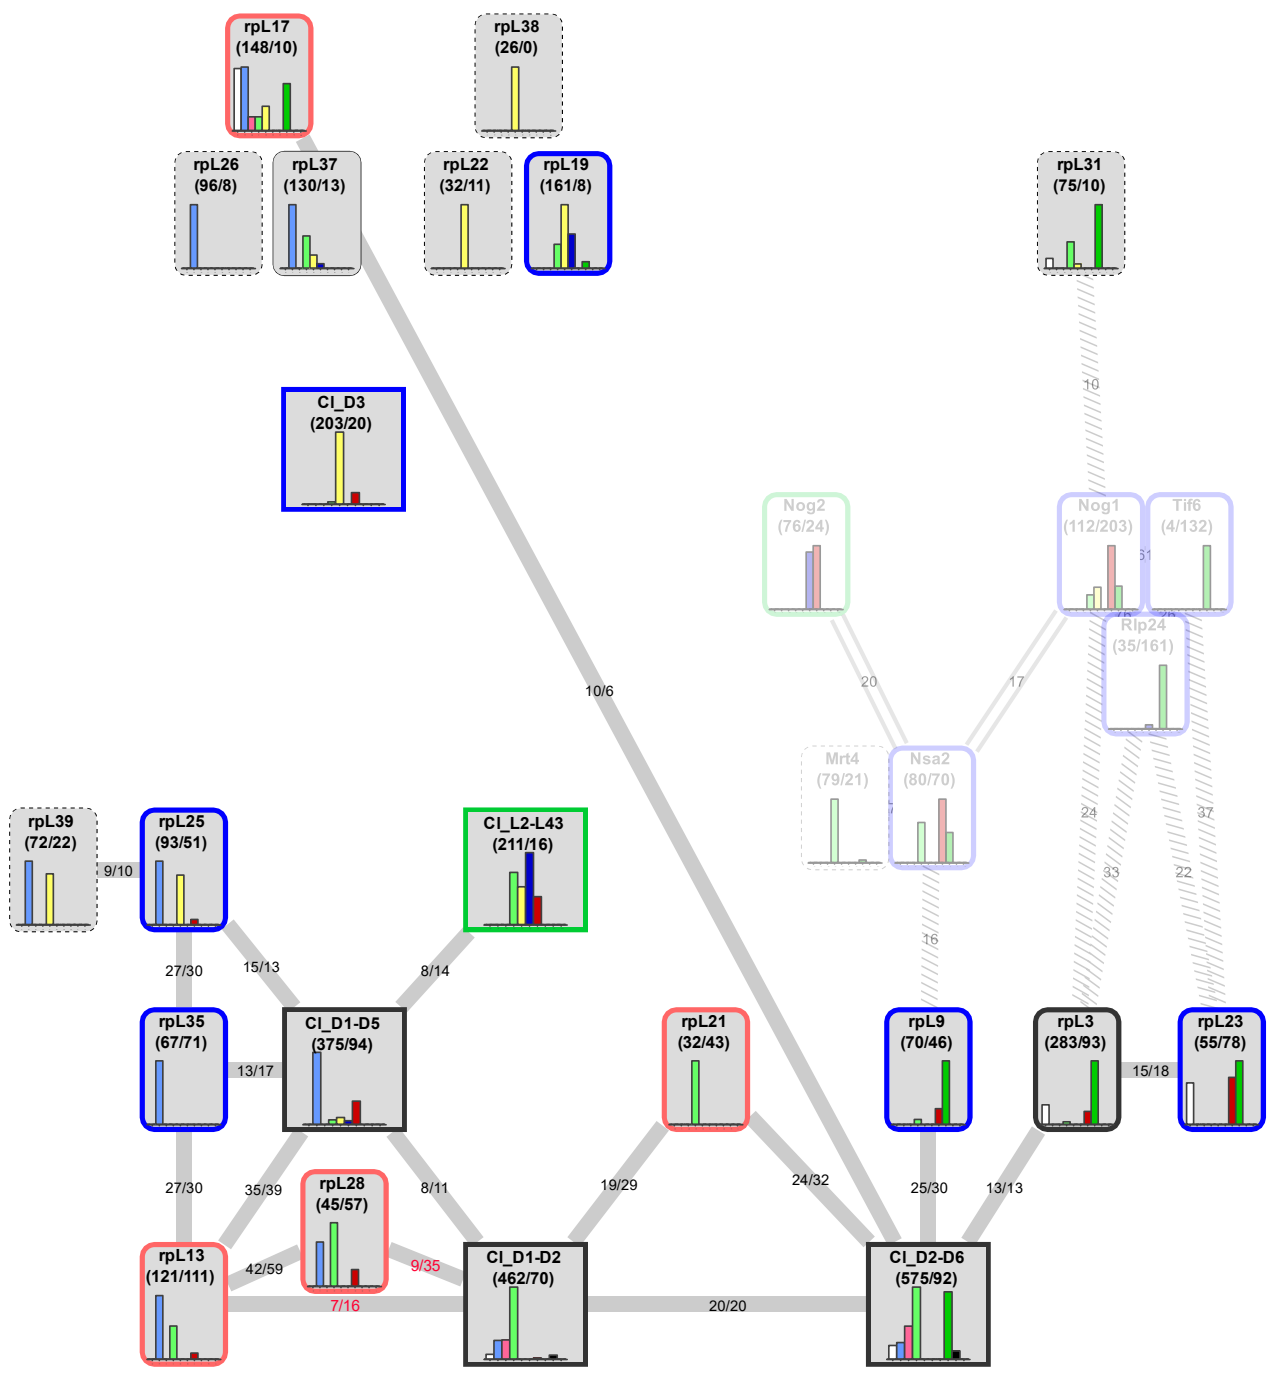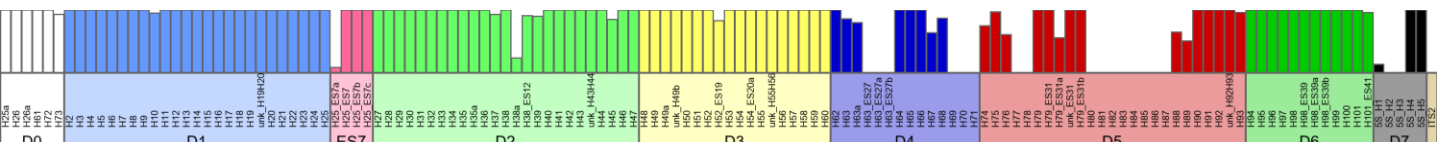

# D) Nog1TAP-B

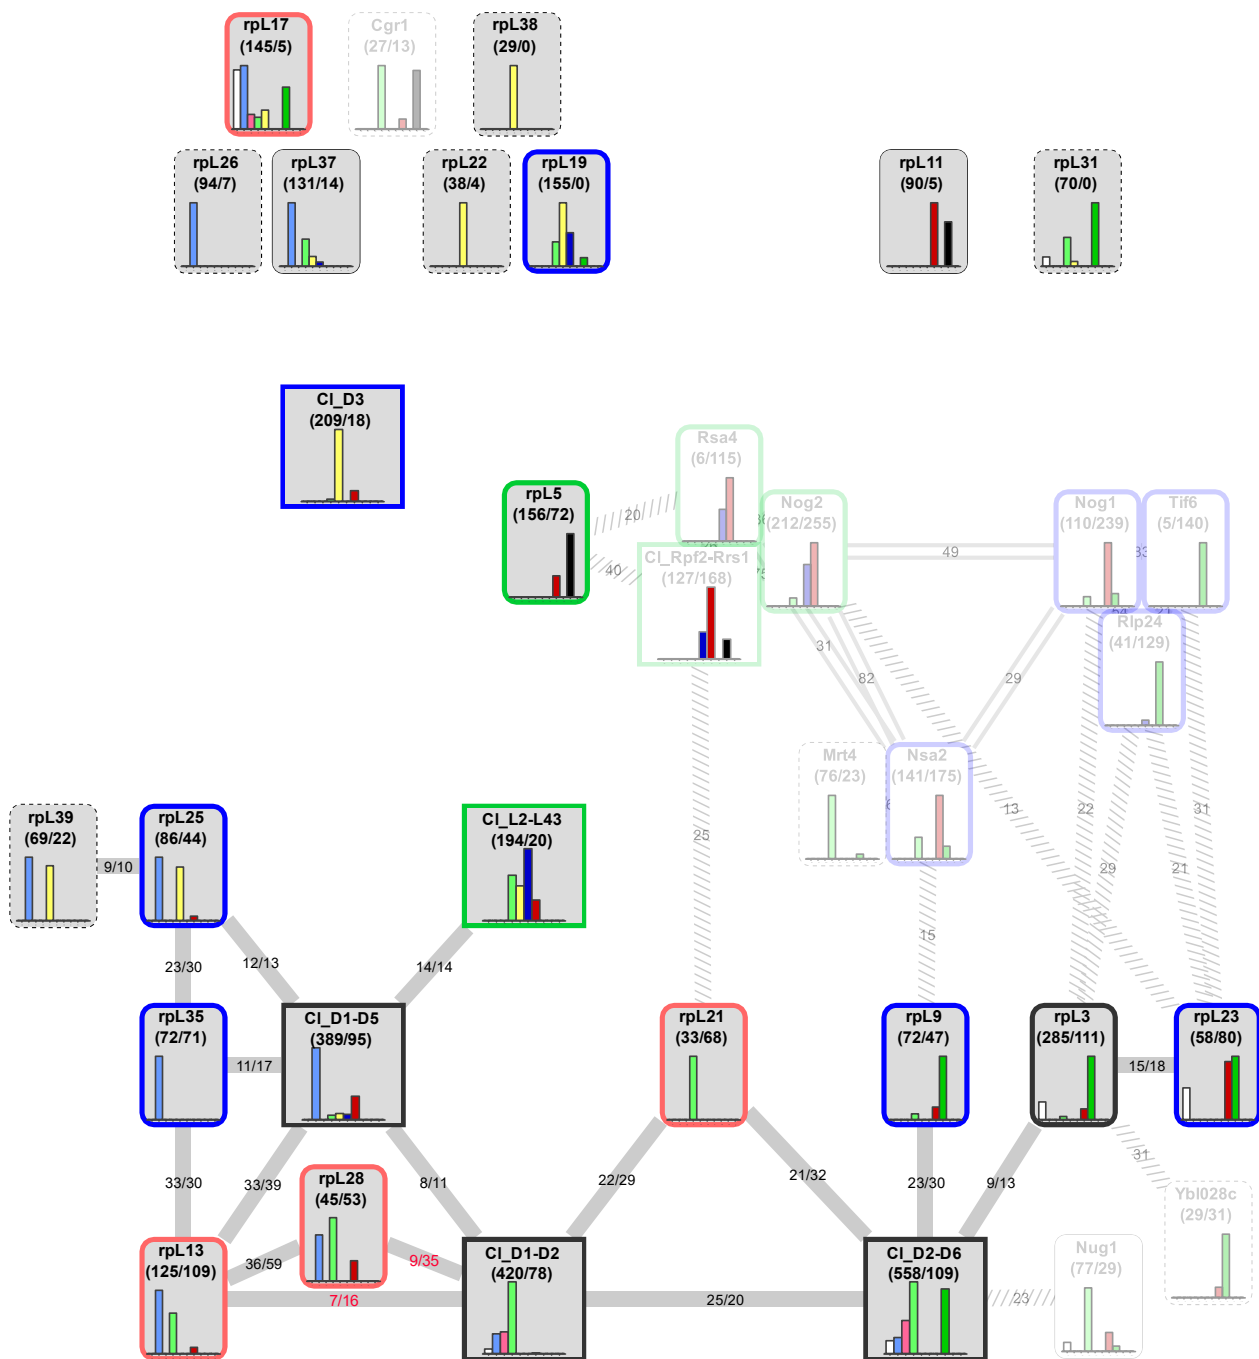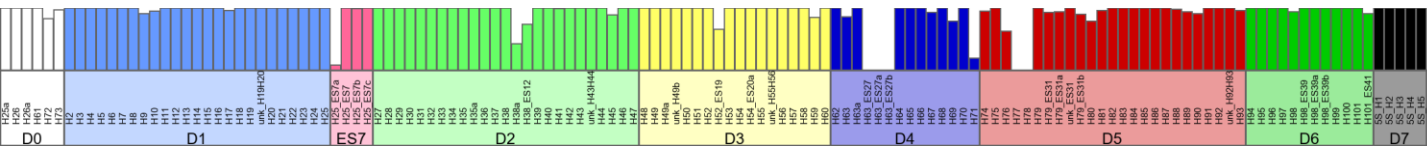



# F) Nog1TAP-E

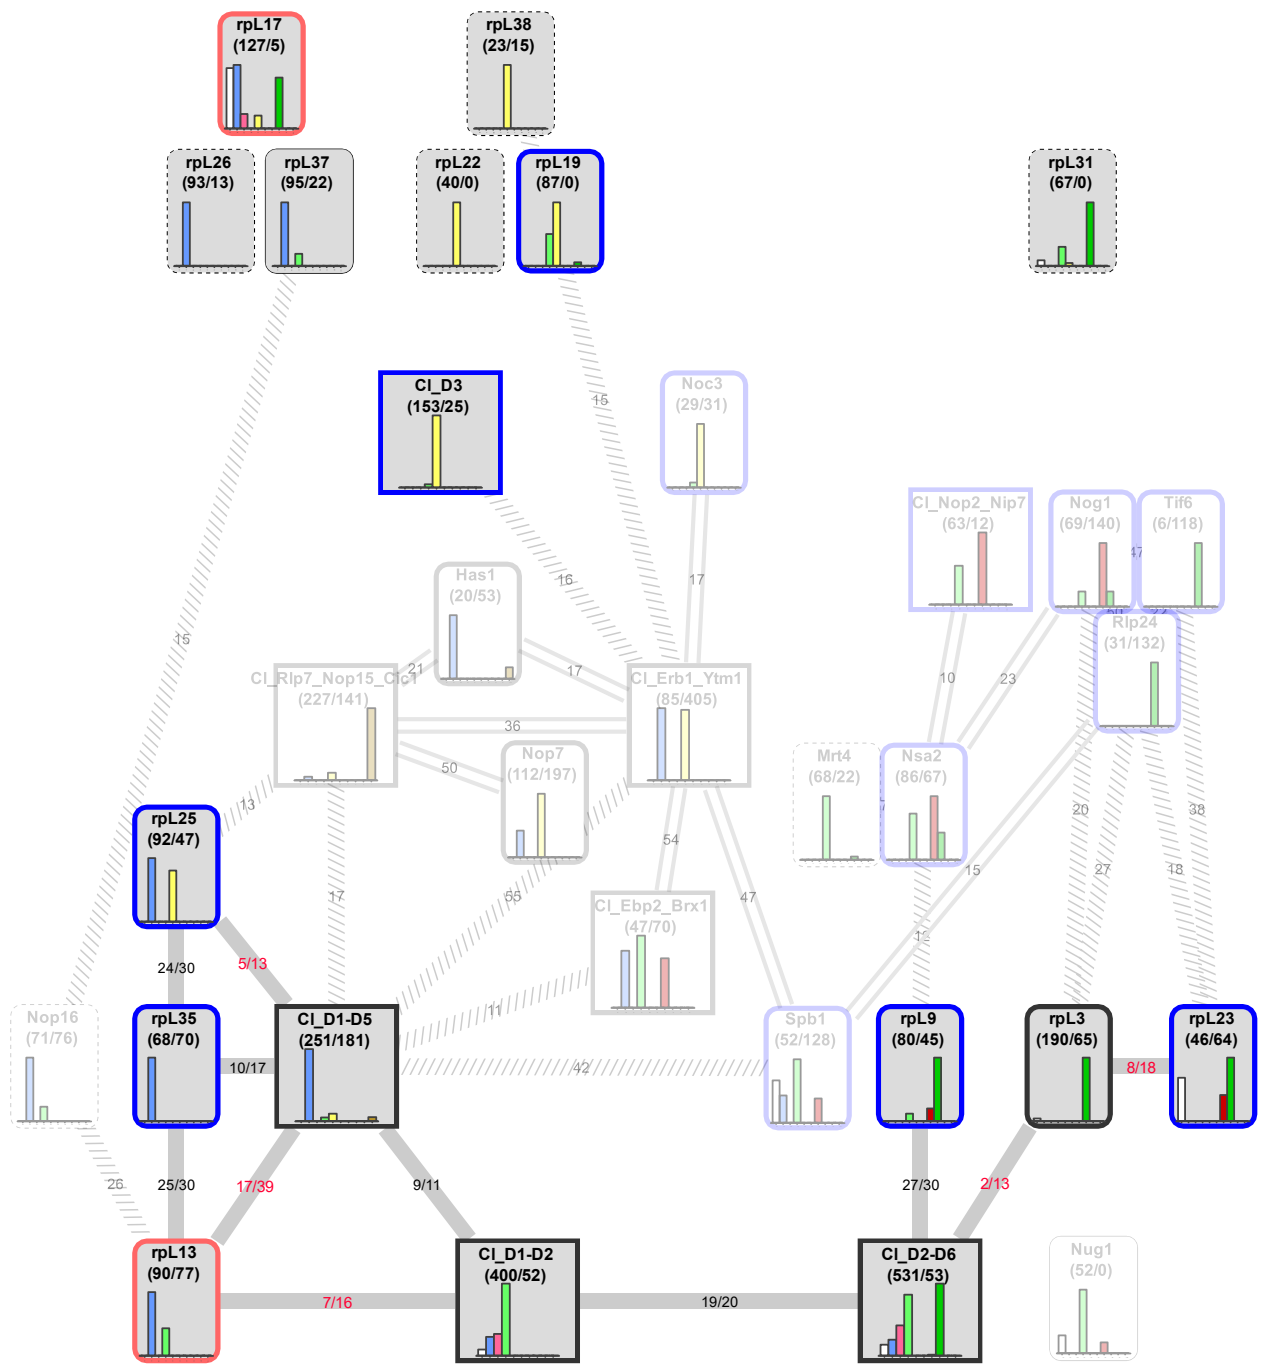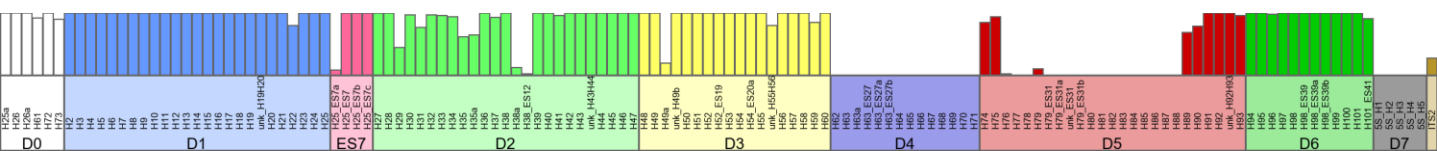







# I) Nog1TAP\_L2-B

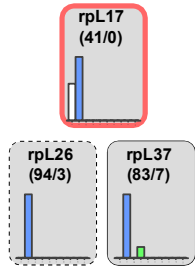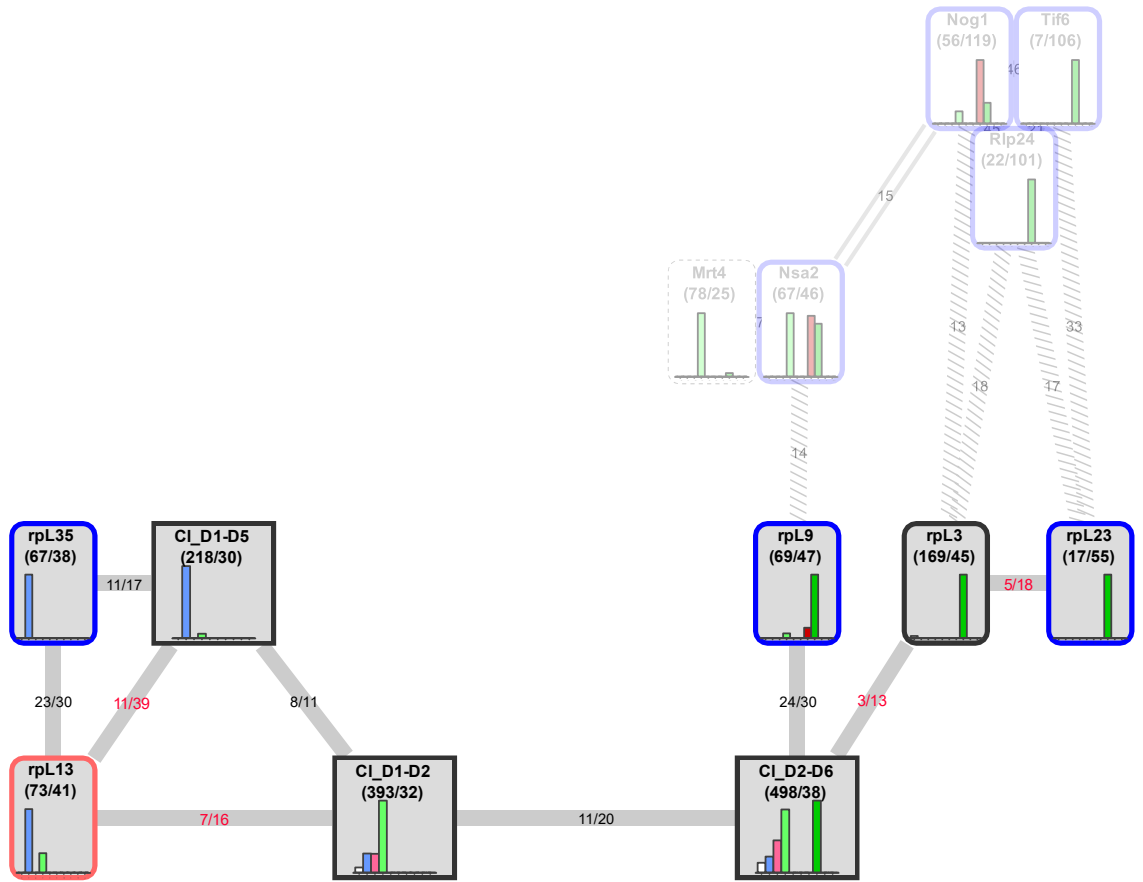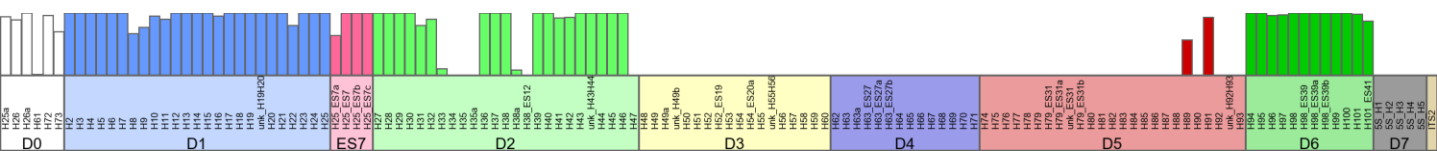

# J) Nog1TAP\_L2-C

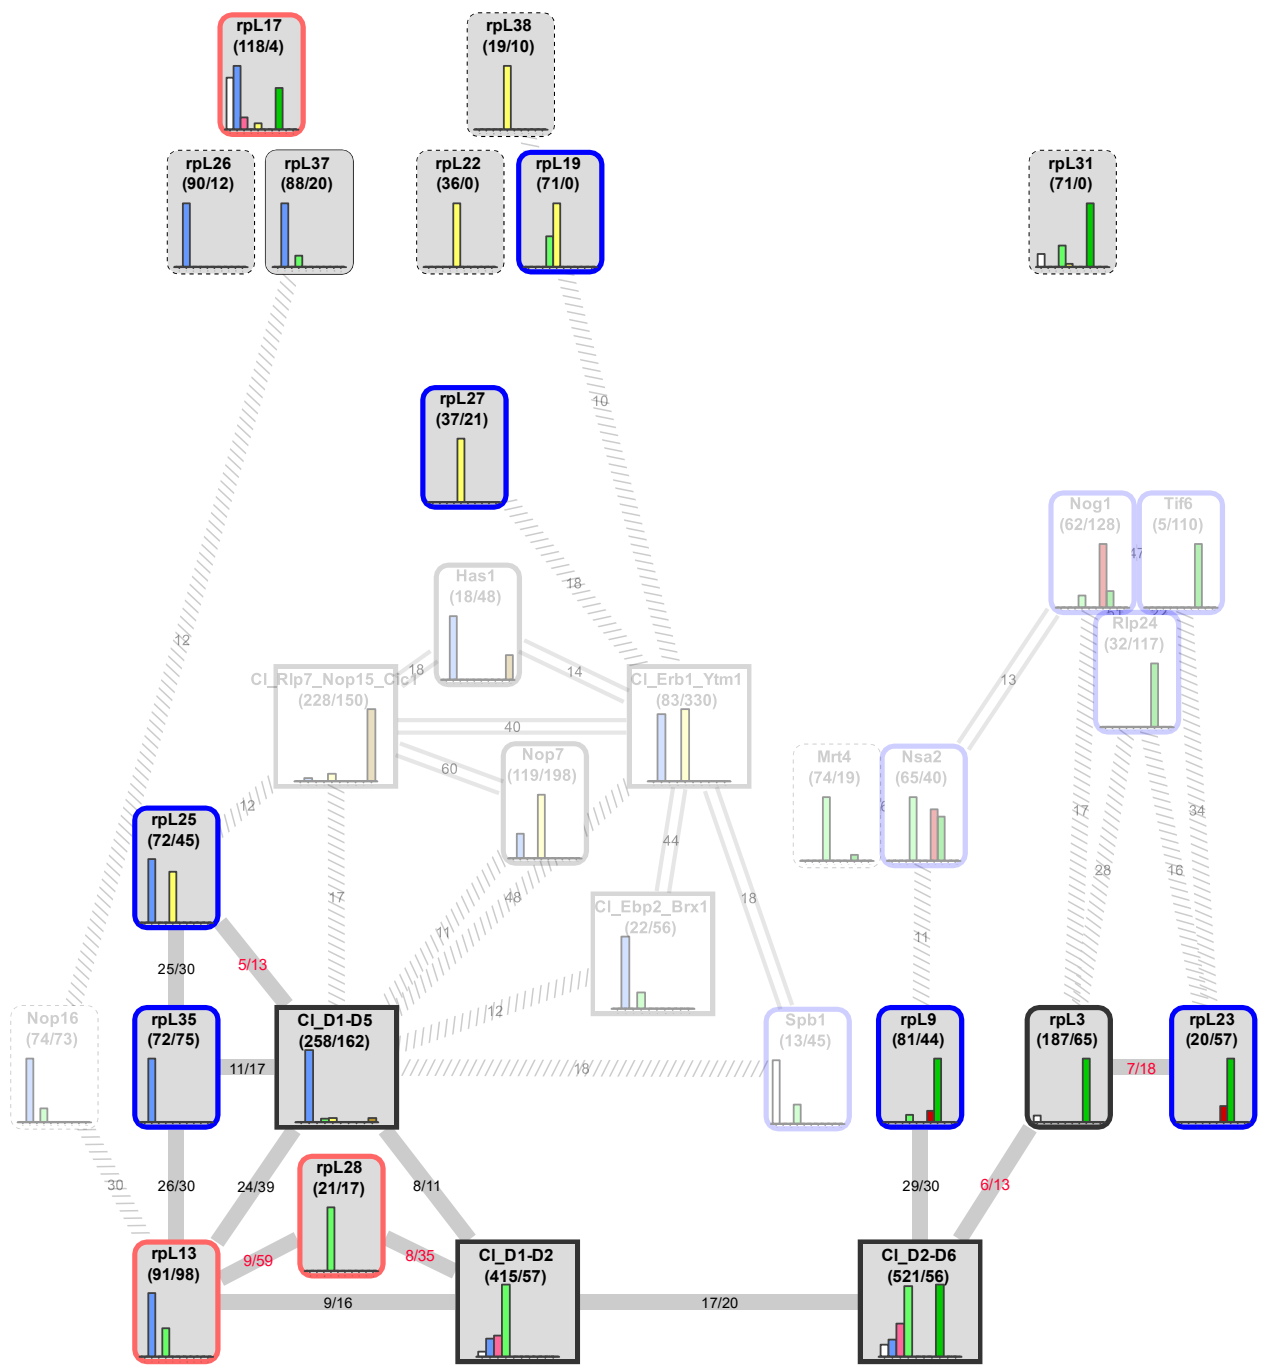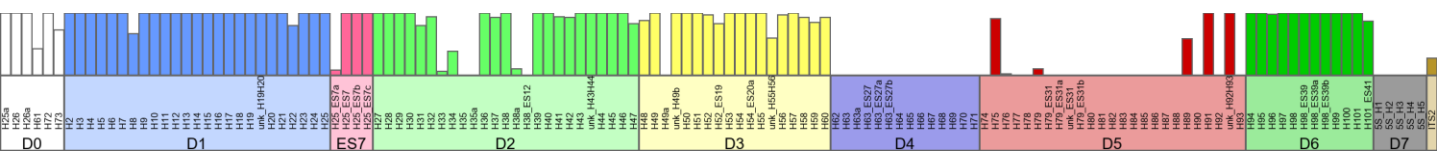





# L) Nog1TAP\_L25-B

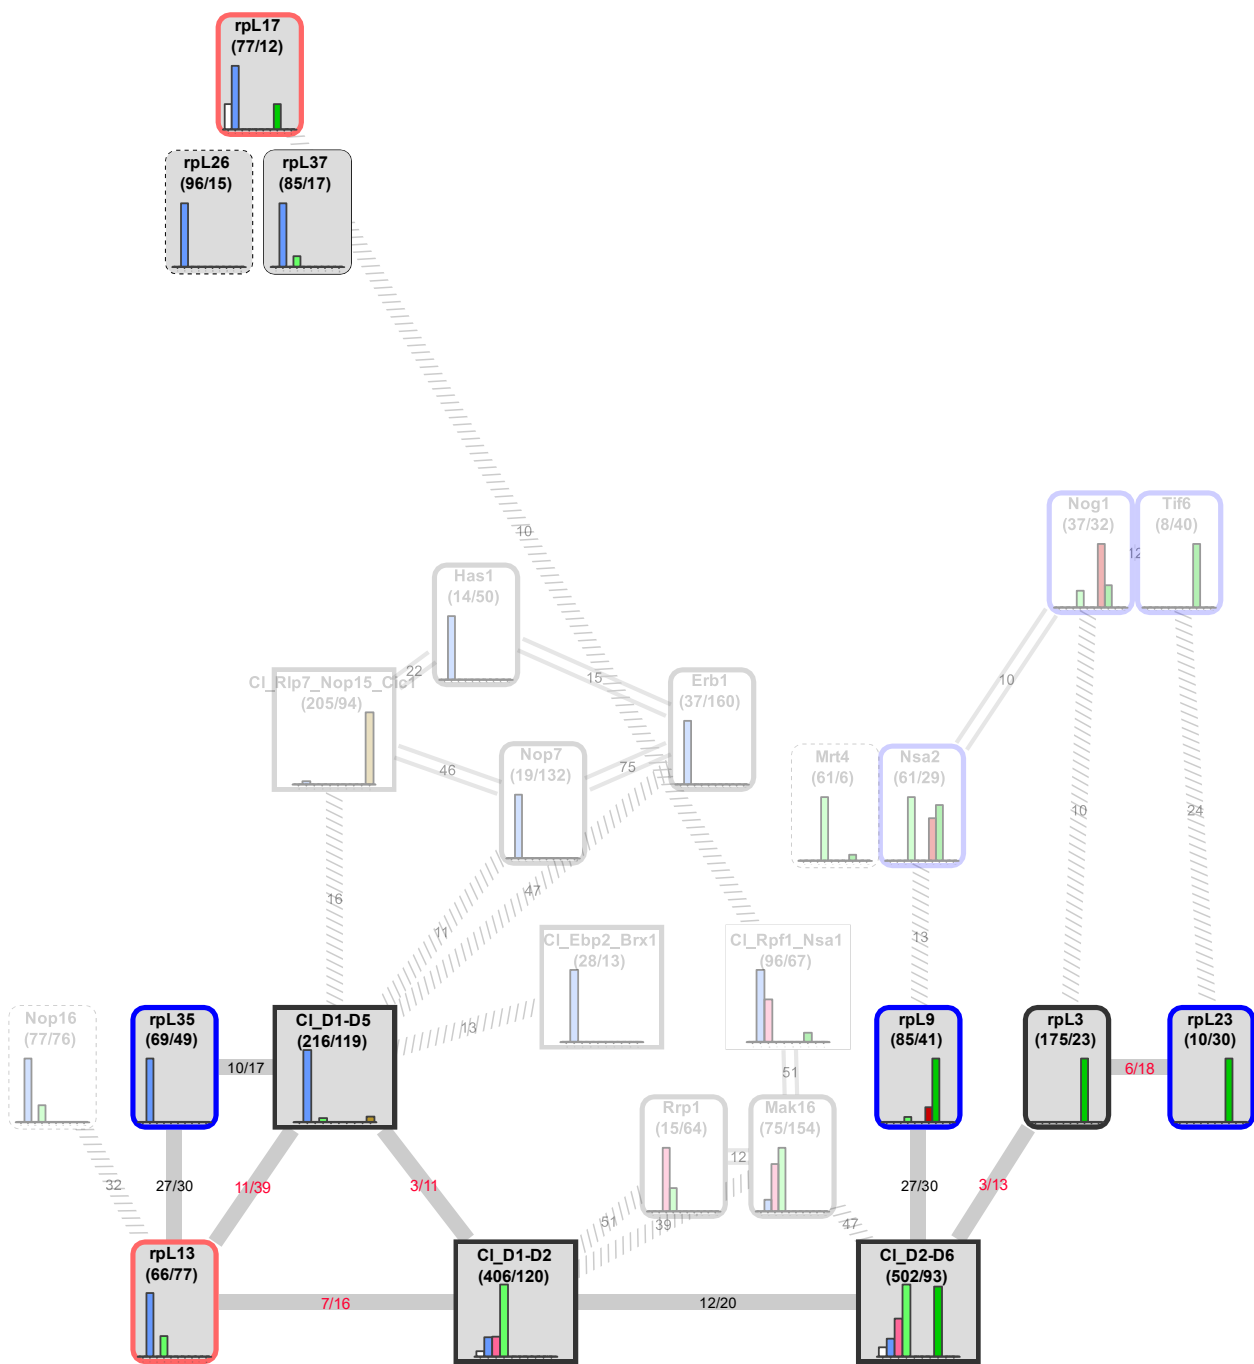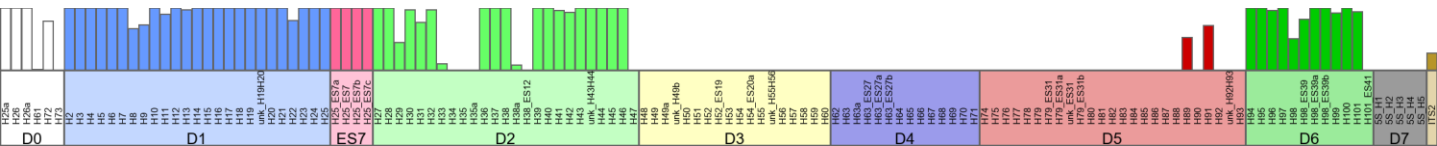

# M) Nog1TAP\_L34-A

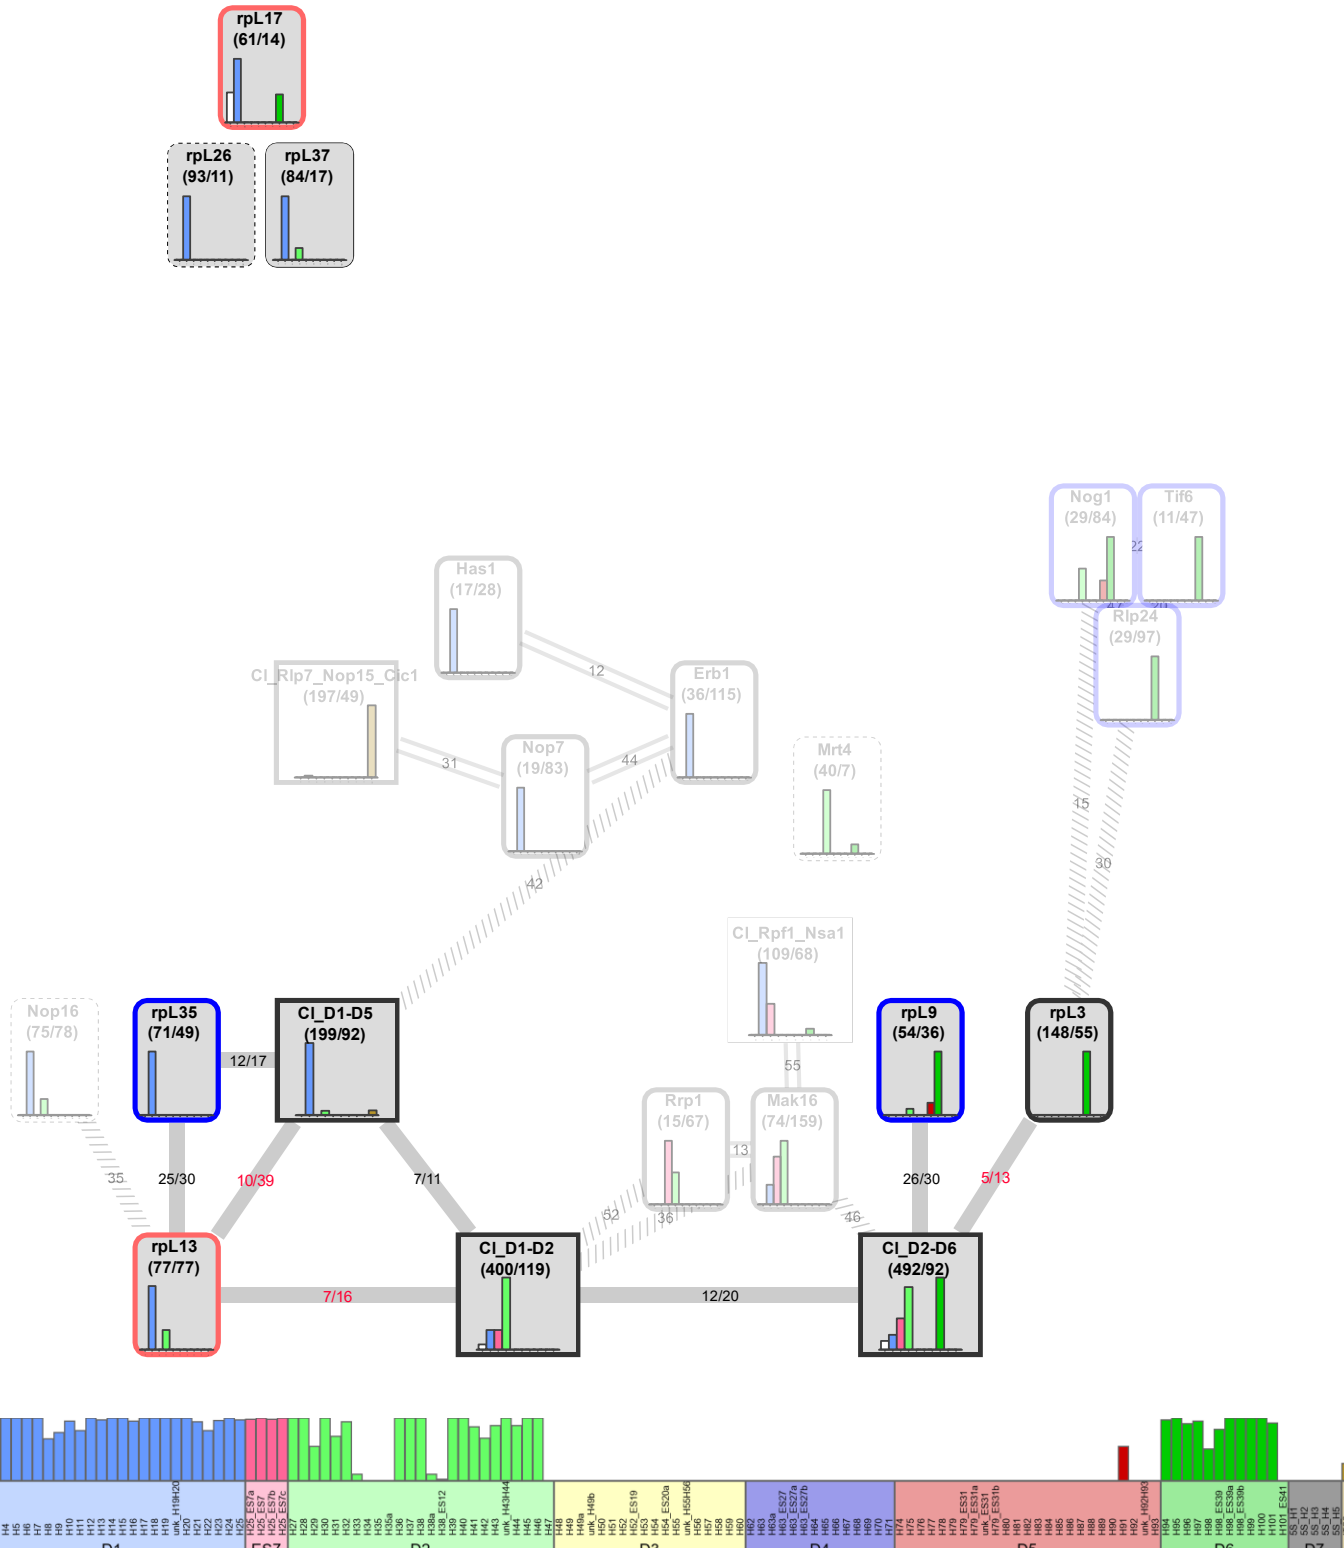

# N) Nog1TAP\_L34-B

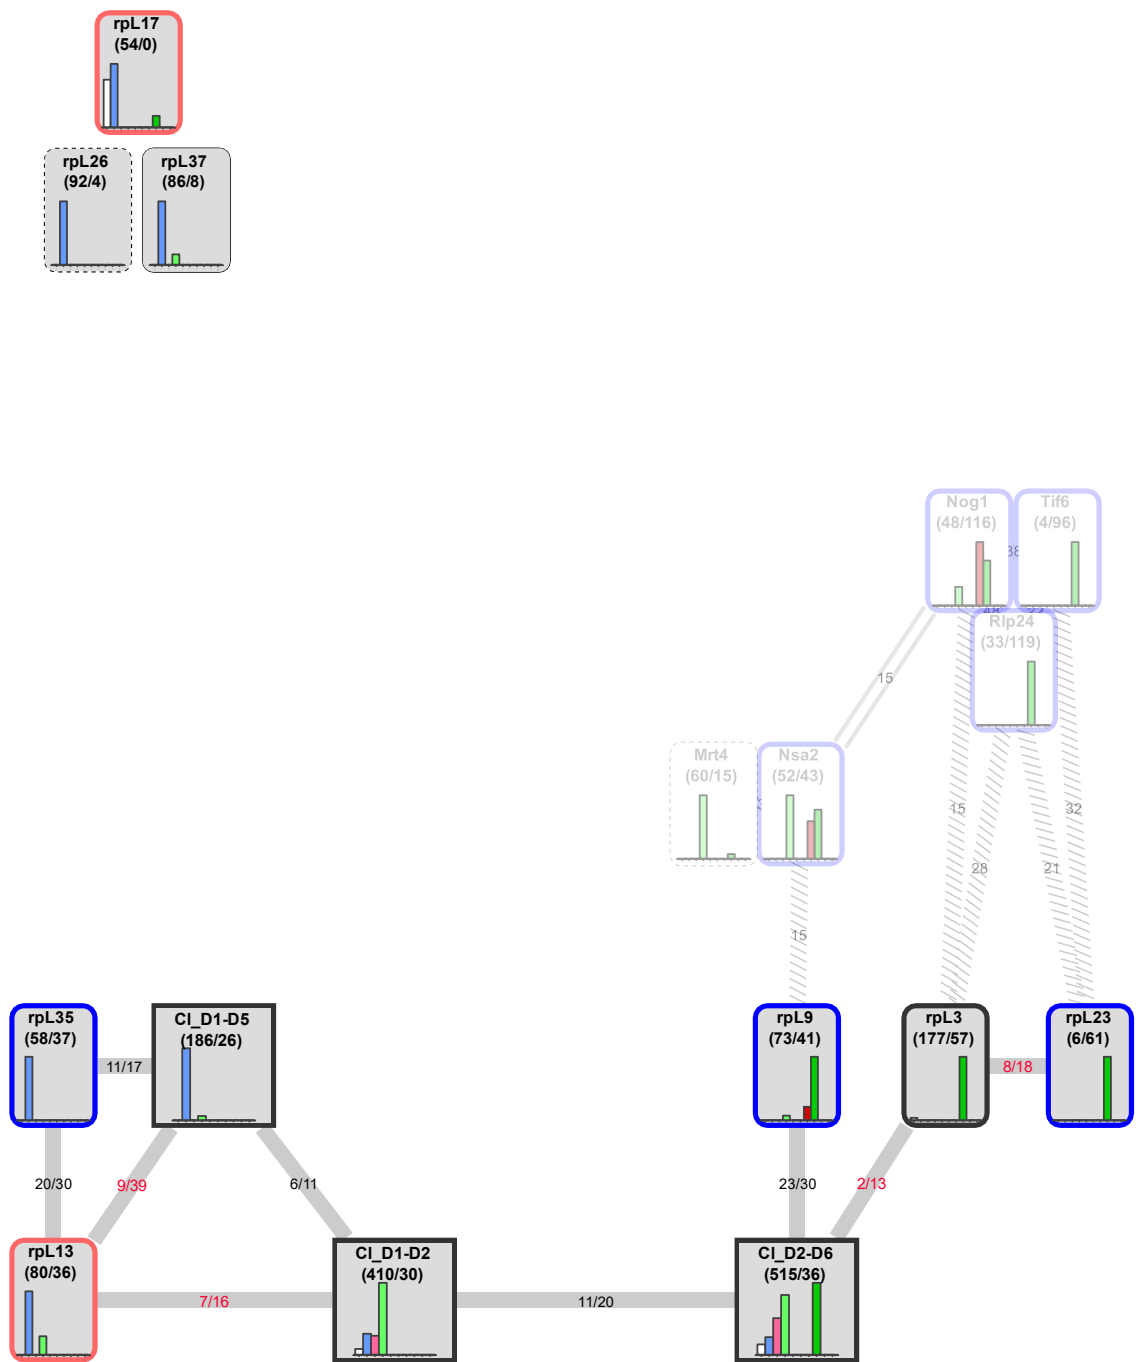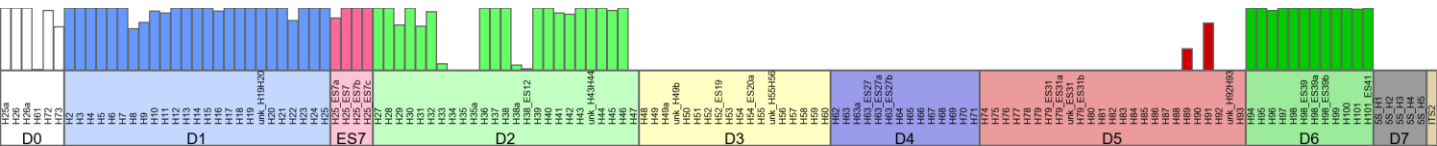

Nog1-TAP

RPL controlled  
by pGAL1/10

YPG

YPD

|   |    |       |
|---|----|-------|
| 1 | -- | --    |
| 2 | x  | --    |
| 3 | x  | RPL25 |
| 4 | x  | RPL2  |
| 5 | x  | RPL34 |

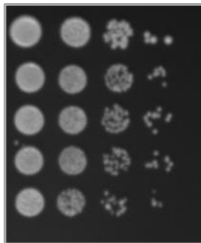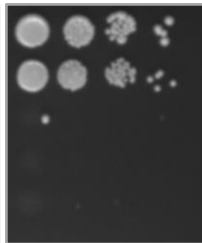



|                                                           | Nog1TAP-A | Nog1TAP-B | Nog1TAP-C | Nog1TAP-E |
|-----------------------------------------------------------|-----------|-----------|-----------|-----------|
| Data collection                                           |           |           |           |           |
| Voltage (kV)                                              | 300       | 300       | 300       | 300       |
| Pixel size (Å)                                            | 1.06      | 1.06      | 1.06      | 1.06      |
| Electron exposure (e/Å <sup>2</sup> )                     | 84.67     | 84.67     | 84.67     | 84.67     |
| Fractions                                                 | 40        | 40        | 40        | 40        |
| Exposure time                                             | 5.16      | 5.16      | 5.16      | 5.16      |
| wwPDB accession code                                      | 7OF1      | 7OH3      | 7OHQ      | 7OHR      |
| EMDB accession code                                       | EMD-12866 | EMD-12892 | EMD-12905 | EMD-12906 |
| EMPIAR accession code                                     | 1212      | 1212      | 1212      | 1212      |
| Map resolution estimates (half maps, FSC threshold 0.143) |           |           |           |           |
| Relion (user mask)                                        | 3.1       | 3.4       | 3.1       | 4.7       |
| Phenix (autom. mask)                                      | 3.1       | 3.6       | 3.1       | 4.8       |
| Model composition                                         |           |           |           |           |
| starting model                                            | 6n8j      | 3jct      | 3jct      | 6elz      |
| Chains                                                    | 44        | 55        | 61        | 52        |
| Protein Residues                                          | 6344      | 8308      | 9547      | 9318      |
| Nucleotides                                               | 2988      | 3289      | 3397      | 2596      |
| Bonds (RMSD)                                              |           |           |           |           |
| Length (Å)                                                | 0.004     | 0.002     | 0.003     | 0.005     |
| Angles (°)                                                | 0.638     | 0.657     | 0.693     | 0.700     |
| Validation                                                |           |           |           |           |
| MolProbity score                                          | 1.60      | 1.74      | 1.85      | 1.58      |
| Clash score                                               | 7.21      | 7.88      | 8.49      | 7.25      |
| Ramachandran plot (%)                                     |           |           |           |           |
| Outliers                                                  | 0.03      | 0.04      | 0.07      | 0.04      |
| Allowed                                                   | 3.21      | 4.38      | 5.70      | 3.04      |
| Favored                                                   | 96.76     | 95.58     | 94.23     | 96.91     |
| Rotamer outliers (%)                                      | 0.77      | 0.68      | 0.84      | 0.99      |
| Model vs. Data                                            |           |           |           |           |
| CC (mask)                                                 | 0.67      | 0.76      | 0.75      | 0.65      |
| CC (box)                                                  | 0.79      | 0.84      | 0.82      | 0.76      |
| CC (peaks)                                                | 0.64      | 0.72      | 0.69      | 0.57      |
| CC (volume)                                               | 0.67      | 0.75      | 0.75      | 0.66      |

|                                       | Nog1TAP-F | Nog1TAP_L2-A | Nog1TAP_L2-B | Nog1TAP_L2-C |
|---------------------------------------|-----------|--------------|--------------|--------------|
| Data collection                       |           |              |              |              |
| Voltage (kV)                          | 300       | 300          | 300          | 300          |
| Pixel size (Å)                        | 1.06      | 1.06         | 1.06         | 1.06         |
| Electron exposure (e/Å <sup>2</sup> ) | 84.67     | 86.45        | 86.45        | 86.45        |
| Fractions                             | 40        | 40           | 40           | 40           |
| Exposure time                         | 5.16      | 5.16         | 5.16         | 5.16         |
| wwPDB accession code                  | 7OHS      | 7OHT         | 7OHU         | 7OHV         |
| EMDB accession code                   | EMD-12907 | EMD-12908    | EMD-12909    | EMD-12910    |
| EMPIAR accession code                 | 1212      | 1213         | 1213         | 1213         |
| Map resolution estimates (half m)     |           |              |              |              |
| Relion (user mask)                    | 4.4       | 4.7          | 3.7          | 3.9          |
| Phenix (autom. mask)                  | 4.5       | 5.0          | 3.8          | 4.0          |
| Model composition                     |           |              |              |              |
| starting model                        | 6em1      | 3jct         | 6em1         | 6elz         |
| Chains                                | 42        | 30           | 27           | 47           |
| Protein Residues                      | 6971      | 5154         | 4202         | 7892         |
| Nucleotides                           | 1909      | 1618         | 1840         | 2361         |
| Bonds (RMSD)                          |           |              |              |              |
| Length (Å)                            | 0.003     | 0.003        | 0.008        | 0.003        |
| Angles (°)                            | 0.684     | 0.687        | 0.675        | 0.676        |
| Validation                            |           |              |              |              |
| MolProbity score                      | 1.65      | 1.90         | 1.52         | 1.66         |
| Clash score                           | 6.81      | 8.27         | 5.40         | 6.62         |
| Ramachandran plot (%)                 |           |              |              |              |
| Outliers                              | 0.01      | 0.10         | 0.00         | 0.01         |
| Allowed                               | 3.99      | 5.30         | 3.52         | 3.14         |
| Favored                               | 95.99     | 94.60        | 96.48        | 96.85        |
| Rotamer outliers (%)                  | 0.76      | 1.28         | 0.45         | 1.39         |
| Model vs. Data                        |           |              |              |              |
| CC (mask)                             | 0.69      | 0.61         | 0.76         | 0.67         |
| CC (box)                              | 0.77      | 0.81         | 0.83         | 0.77         |
| CC (peaks)                            | 0.62      | 0.59         | 0.70         | 0.63         |
| CC (volume)                           | 0.68      | 0.61         | 0.75         | 0.67         |

|                                          | Nog1TAP_L25-A | Nog1TAP_L25-B | Nog1TAP_L34-A | Nog1TAP_L34-B |
|------------------------------------------|---------------|---------------|---------------|---------------|
| <b>Data collection</b>                   |               |               |               |               |
| Voltage (kV)                             | 300           | 300           | 300           | 300           |
| Pixel size (Å)                           | 1.06          | 1.06          | 1.06          | 1.06          |
| Electron exposure (e/Å <sup>2</sup> )    | 86.09         | 86.09         | 88            | 88            |
| Fractions                                | 40            | 40            | 40            | 40            |
| Exposure time                            | 5.16          | 5.16          | 5.16          | 5.16          |
| wwPDB accession code                     | 7OHP          | 7OHW          | 7OHX          | 7OHY          |
| EMDB accession code                      | EMD-12904     | EMD-12911     | EMD-12912     | EMD-12913     |
| EMPIAR accession code                    | 1214          | 1214          | 1215          | 1215          |
| <b>Map resolution estimates (half m)</b> |               |               |               |               |
| Relion (user mask)                       | 3.9           | 3.5           | 3.2           | 3.9           |
| Phenix (autom. mask)                     | 4.0           | 3.6           | 3.2           | 4.0           |
| <b>Model composition</b>                 |               |               |               |               |
| starting model                           | 6em1          | 6em1          | 6em1          | 6em1          |
| Chains                                   | 35            | 41            | 39            | 28            |
| Protein Residues                         | 5290          | 6824          | 6076          | 4067          |
| Nucleotides                              | 1781          | 1853          | 1774          | 1837          |
| <b>Bonds (RMSD)</b>                      |               |               |               |               |
| Length (Å)                               | 0.005         | 0.003         | 0.005         | 0.002         |
| Angles (°)                               | 0.706         | 0.680         | 0.705         | 0.633         |
| <b>Validation</b>                        |               |               |               |               |
| MolProbity score                         | 1.73          | 1.61          | 1.61          | 1.70          |
| Clash score                              | 7.60          | 6.15          | 6.57          | 7.40          |
| <b>Ramachandran plot (%)</b>             |               |               |               |               |
| Outliers                                 | 0.16          | 0.06          | 0.00          | 0.03          |
| Allowed                                  | 4.32          | 3.92          | 3.66          | 4.16          |
| Favored                                  | 95.52         | 96.02         | 96.34         | 95.82         |
| <b>Rotamer outliers (%)</b>              |               |               |               |               |
|                                          | 1.01          | 0.66          | 0.81          | 0.61          |
| <b>Model vs. Data</b>                    |               |               |               |               |
| CC (mask)                                | 0.64          | 0.75          | 0.67          | 0.72          |
| CC (box)                                 | 0.80          | 0.81          | 0.79          | 0.82          |
| CC (peaks)                               | 0.58          | 0.68          | 0.61          | 0.68          |
| CC (volume)                              | 0.63          | 0.75          | 0.66          | 0.72          |

### Nog1TAP-A

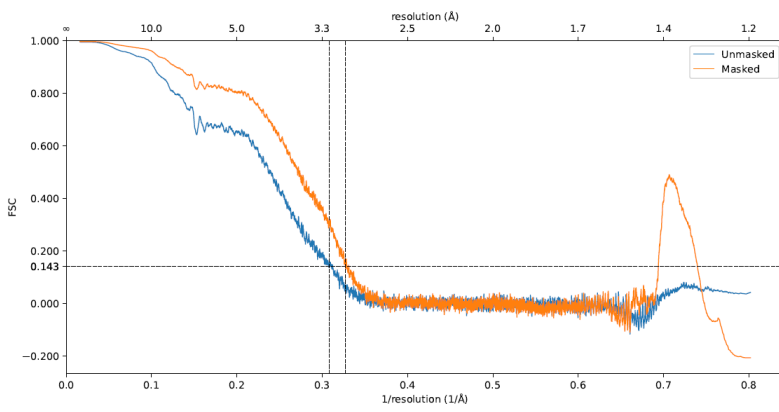

### Nog1TAP-B

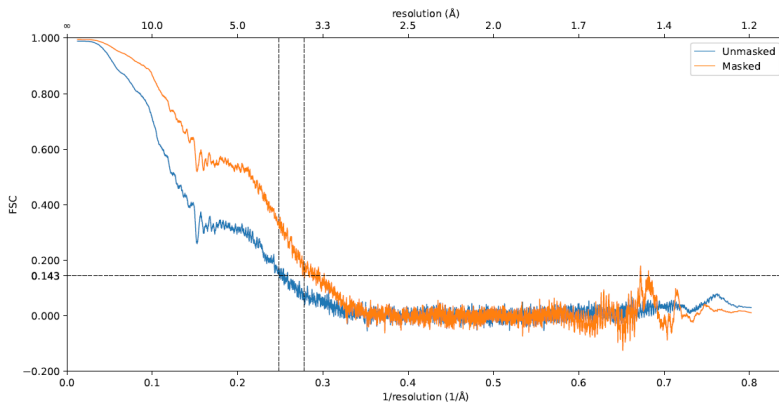

### Nog1TAP-C

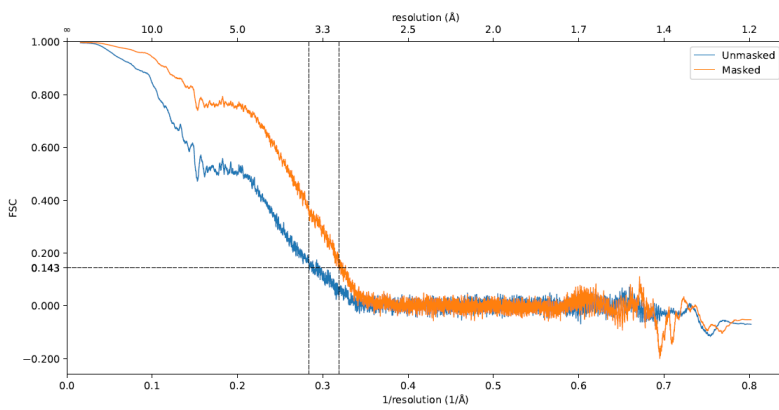

### Nog1TAP-E

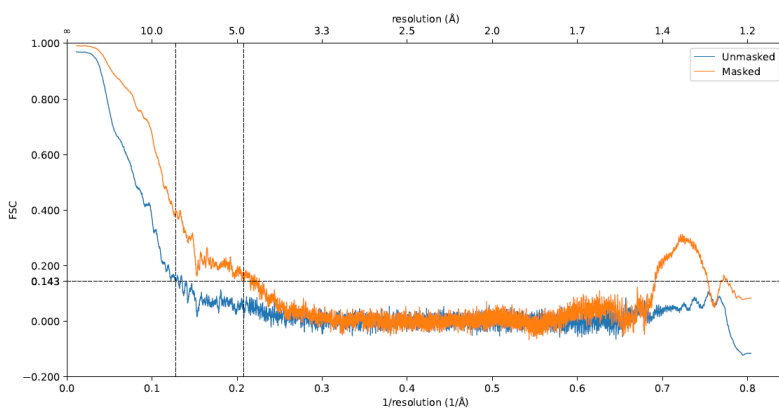

# Nog1TAP-F

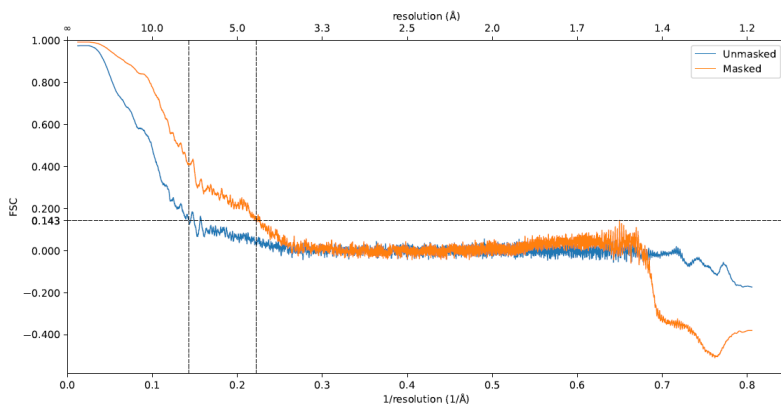

# Nog1TAP\_L2-A

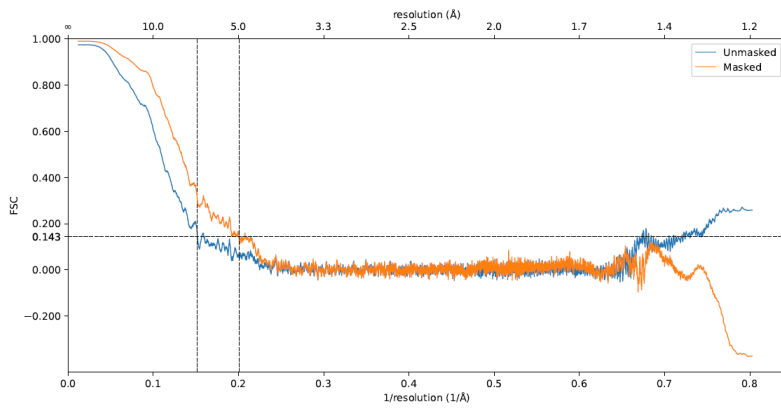

# Nog1TAP\_L2-B

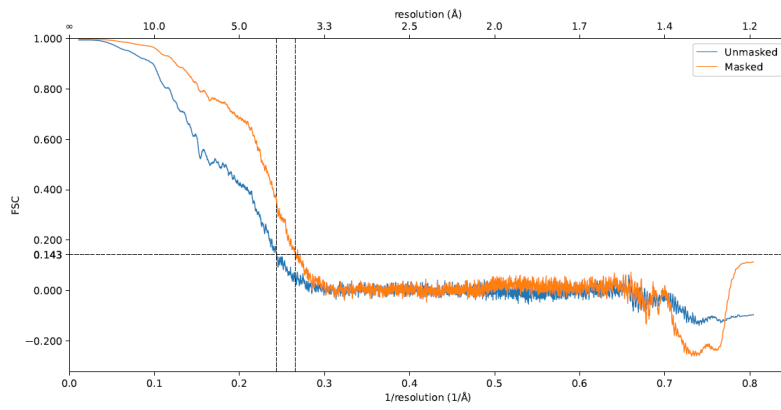

# Nog1TAP\_L2-C

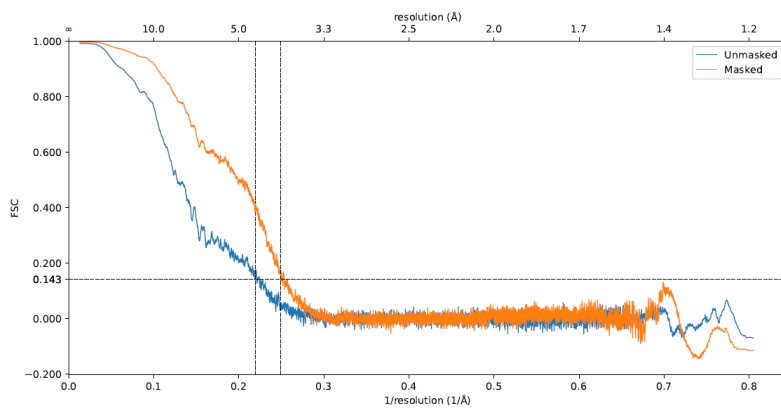



Nog1TAP\_L25-A

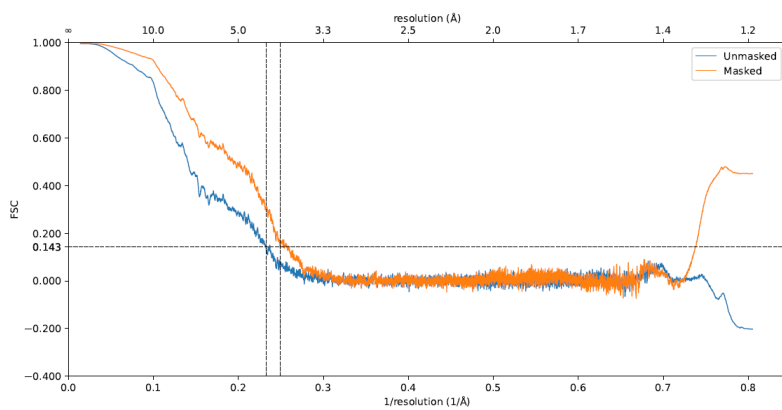

Nog1TAP\_L25-B

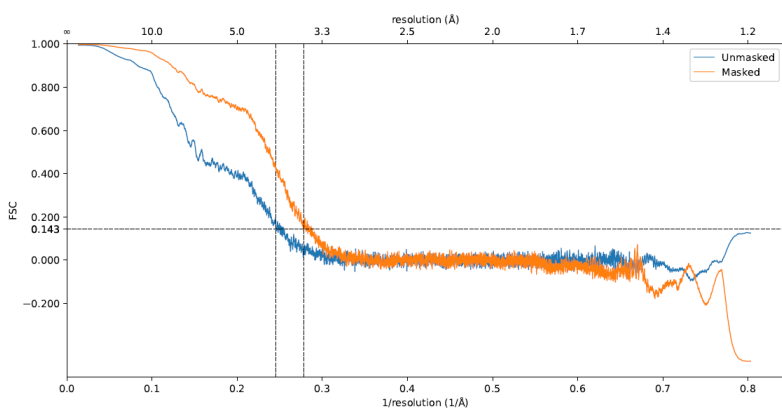

Nog1TAP\_L34-A

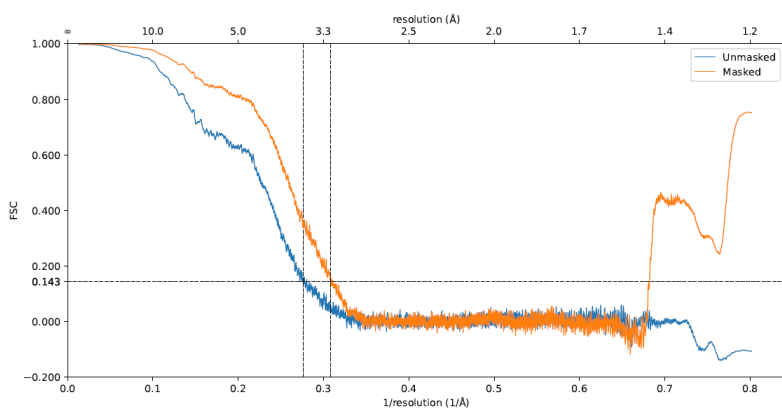

Nog1TAP\_L34-B

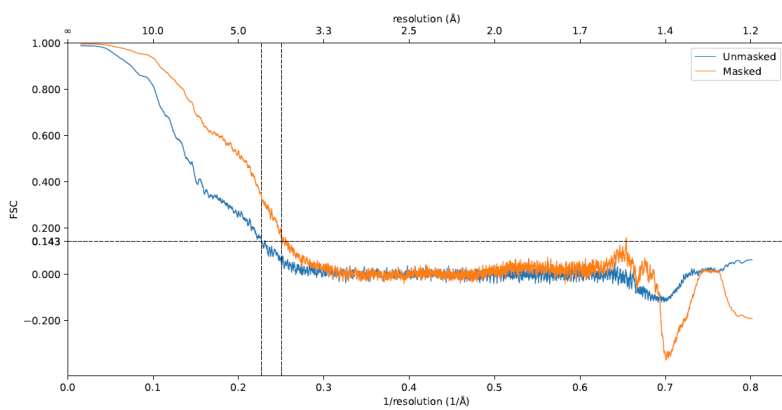

# A) Nog1TAP

Extraction of 509.900 particles from 6.828 micrographs with 2x binning, based on autopicking

Selection of 267.675 particles after three rounds of 2D classification

3D auto-refine, unbinned re-extraction, Ctf-refinement, polishing

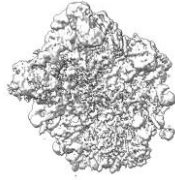

3D auto-refine (2.836Å)

3D classification with 10 classes

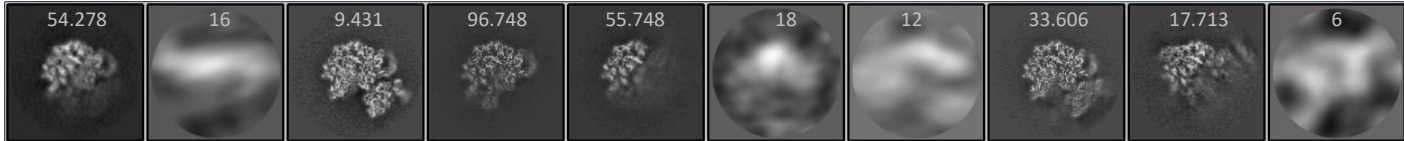

mature rib. particles

Nog1TAP\_D

mature rib. particles

3D auto-refine followed by focussed 3D classification with 4 classes (mask around „foot“ region)

3D auto-refine followed by 3D classification with 3 classes

59.864 particles of Class 1 + 3

34.162 particles of Class 2

3D auto-refine followed by focussed 3D classification (mask around „head“ region)

41.041 particles

18.823 particles

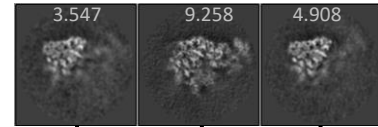

8455 particles

9258 particles

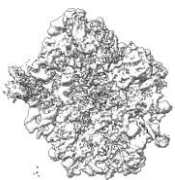

Nog1TAP\_A (3.06Å)

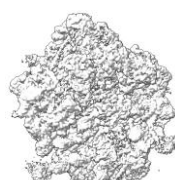

Nog1TAP\_B (3.35Å)

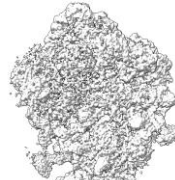

Nog1TAP\_C (3.04Å)

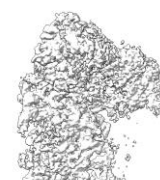

Nog1TAP\_F (4.38Å)

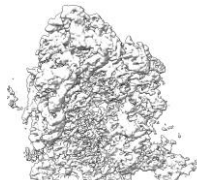

Nog1TAP\_E (4.72Å)

## B) Nog1TAP\_L2

Extraction of 258.042 particles with 2x binning, based on autopicking

Selection of 98.109 particles with better than 5 Å resolution and after two rounds of 2D classification and one round of 3D classification

3D auto-refine, unbinned re-extraction, Ctf-refinement, polishing

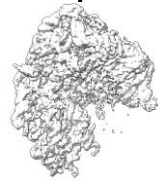

3D auto-refine  
(3.57Å)

3D classification with 6 classes

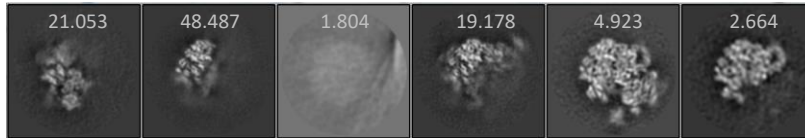

mature ribosomal particles

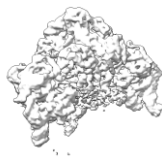

3D auto-refine  
Nog1TAP\_L2-A  
(4.67Å)

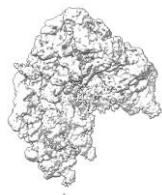

3D auto-refine  
Nog1TAP\_L2-B  
(3.66Å)

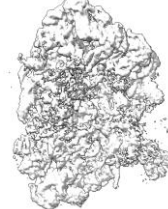

3D auto-refine  
Nog1TAP\_L2-C  
(3.90Å)

# C) Nog1TAP\_L25

Extraction of 384.469 particles with 2x binning, based on autopicking

Selection of 123.971 particles based on one round of 2D and another round of 2D classification on particles aligned by 3D auto-refinement

3D auto-refine, unbinned re-extraction, Ctf-refinement, polishing

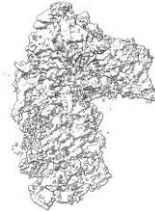

3D auto-refine (3.4Å)

3D classification with 4 classes

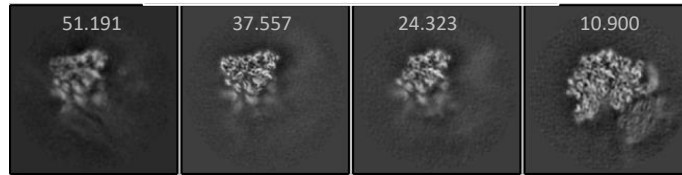

mature rib. particles

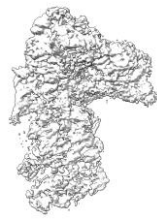

3D auto-refine  
Nog1TAP\_L25-A  
(3.86Å)

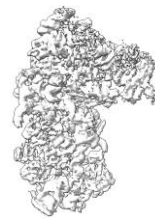

3D auto-refine  
Nog1TAP\_L25-B  
(3.48Å)

# D) Nog1TAP\_L34

Extraction of 244.299 particles with 2x binning, based on autopicking

Selection of 178.955 particles based on one round of 2D classification

Selection of 166.873 candidate pre-60S particles based on one round of 3D classification

3D auto-refine, unbinned re-extraction, Ctf-refinement, polishing

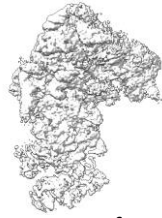

3D auto-refine  
(3.2Å)

3D classification with 12 classes

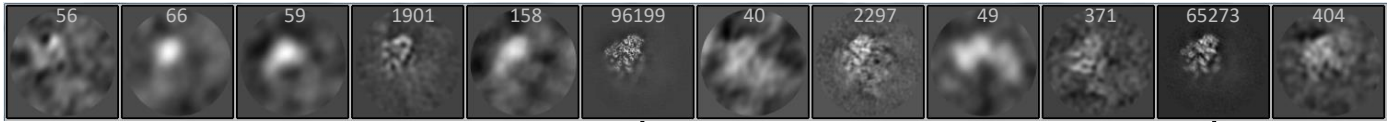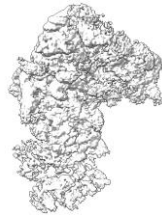

3D auto-refine  
(3.17Å)

3D classification with 6 classes

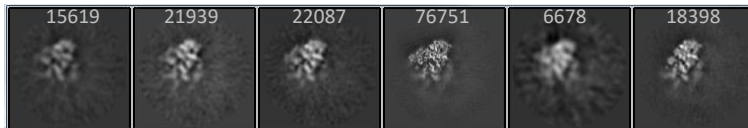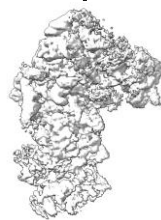

3D auto-refine  
Nog1TAP\_L34-A  
(3.3Å)

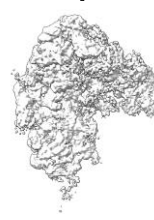

3D auto-refine  
Nog1TAP\_L34-B  
(3.9Å)
